# Supplementary material for: Phosphatase Shp2 regulates biogenesis of small extracellular vesicles by dephosphorylating Syntenin
Source: PubMed Central journal article supplement (PMC7944561; doi:10.1002/jev2.12078), 2021-03-10

# Figure S1

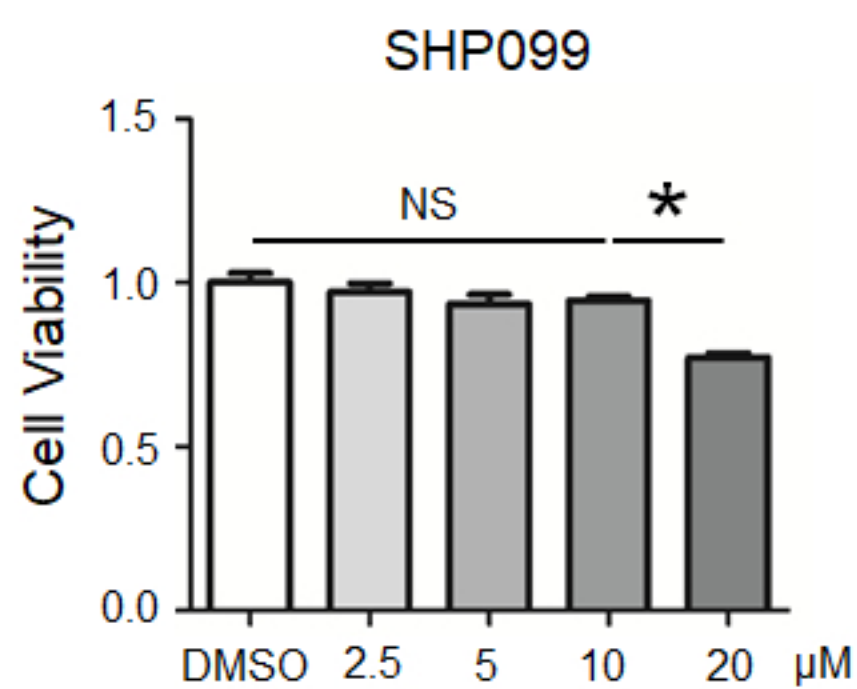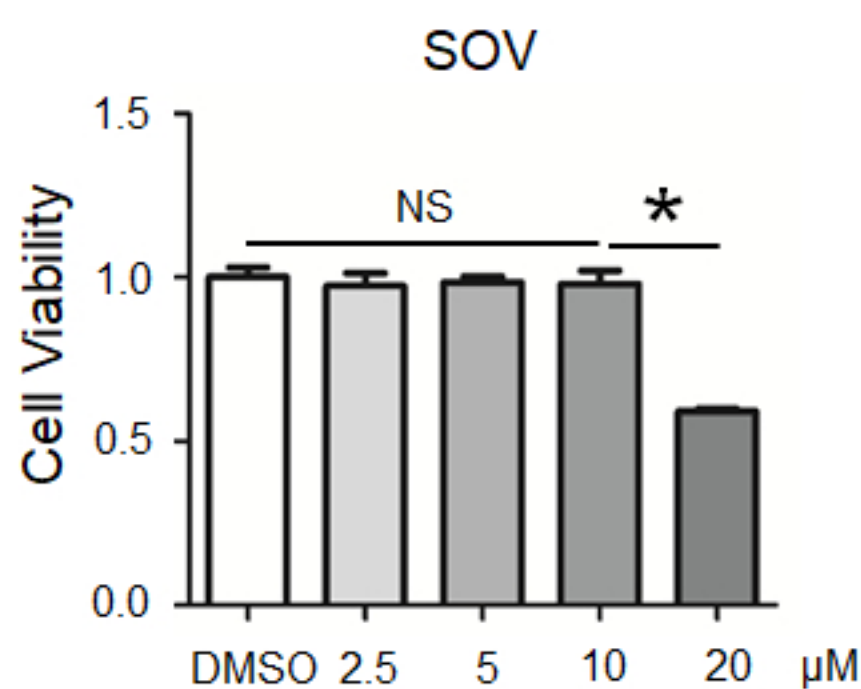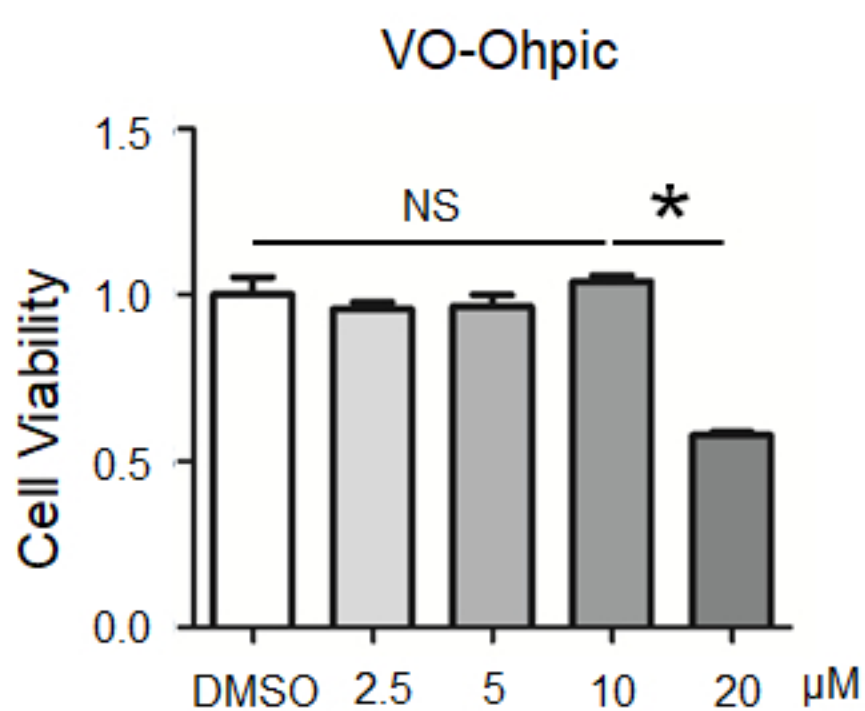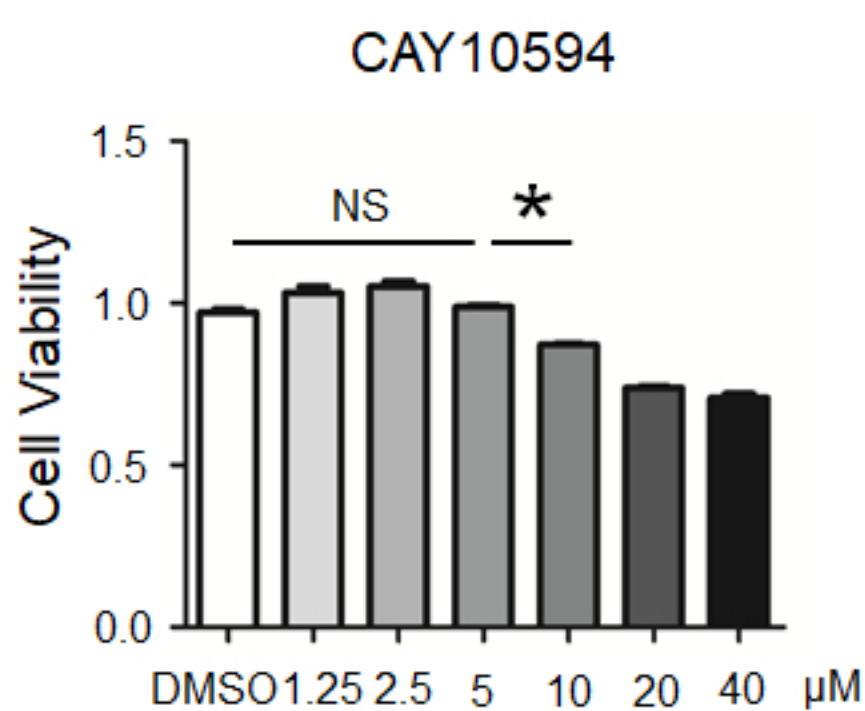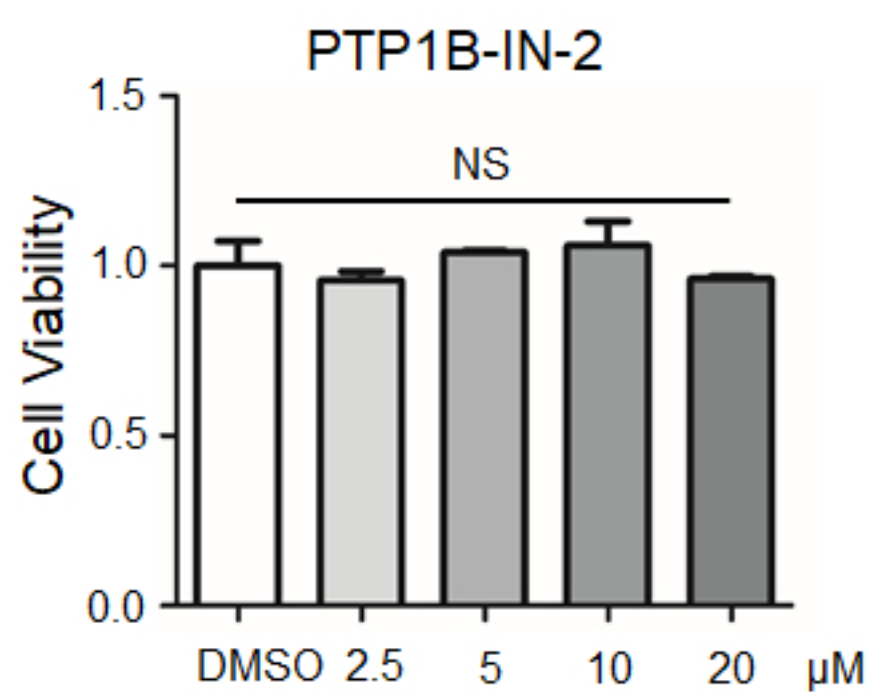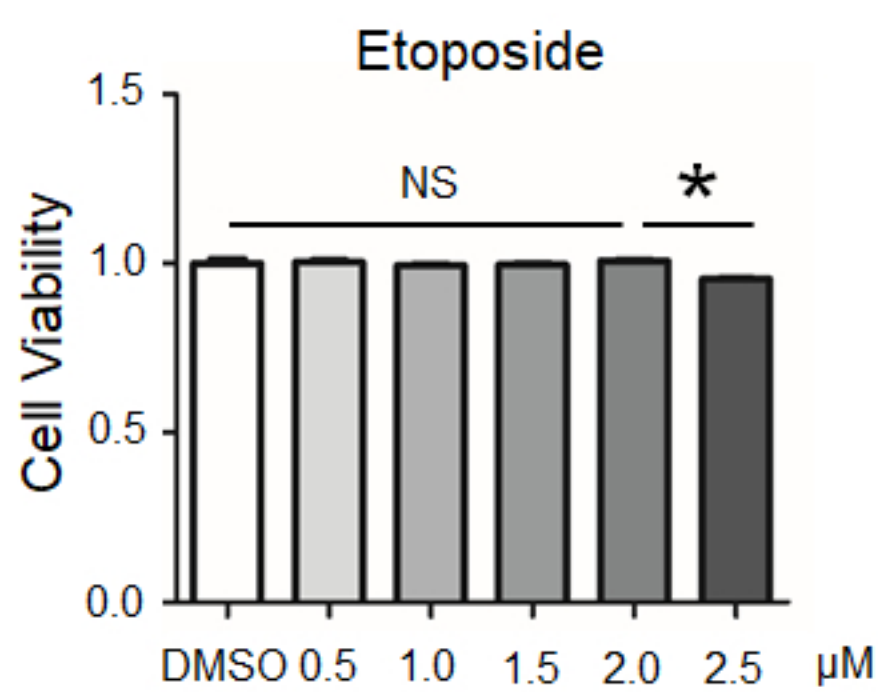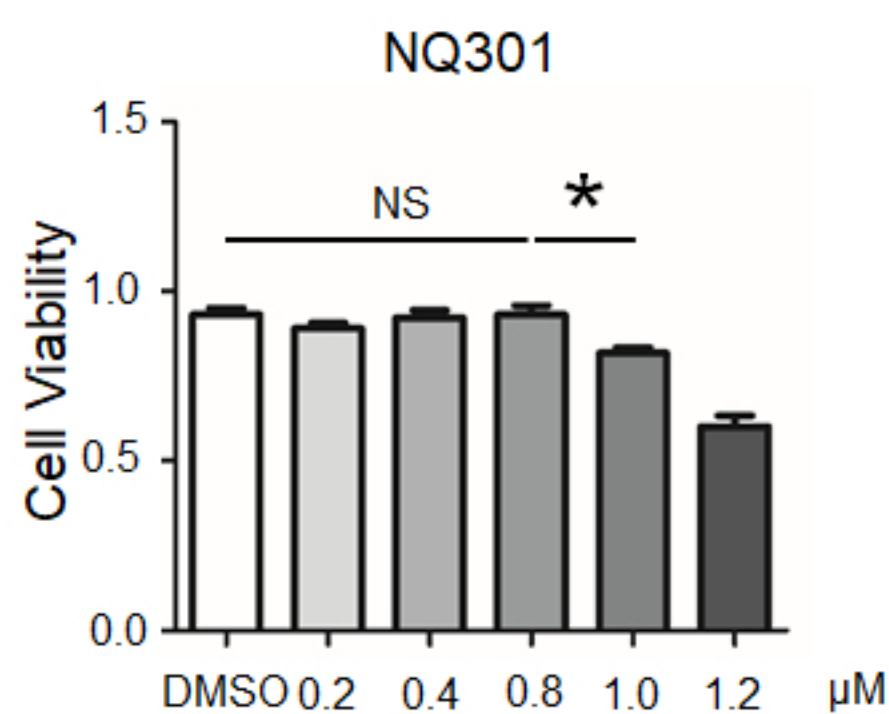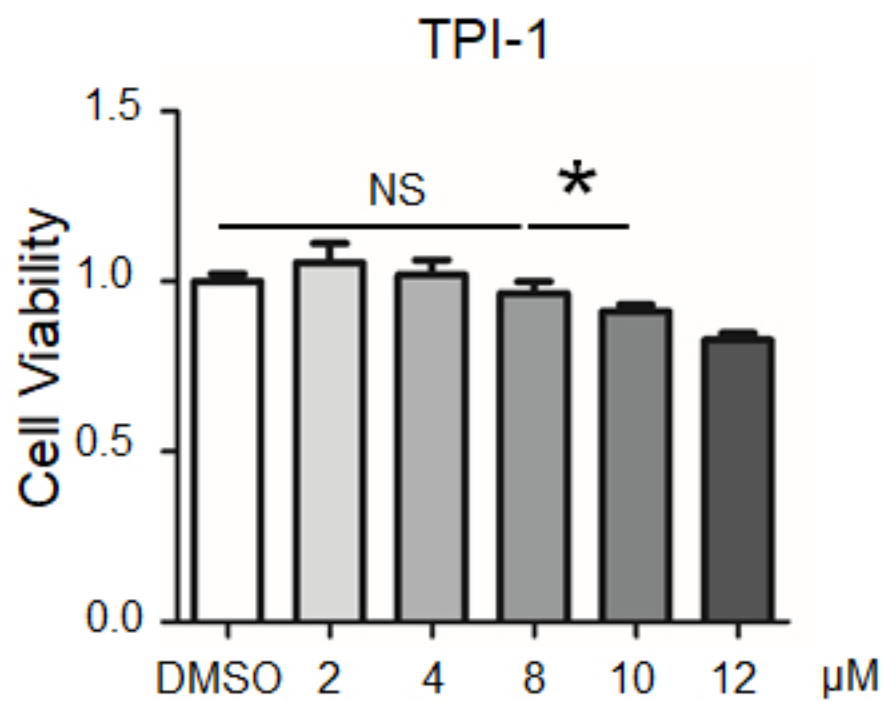

# Figure S2

## A

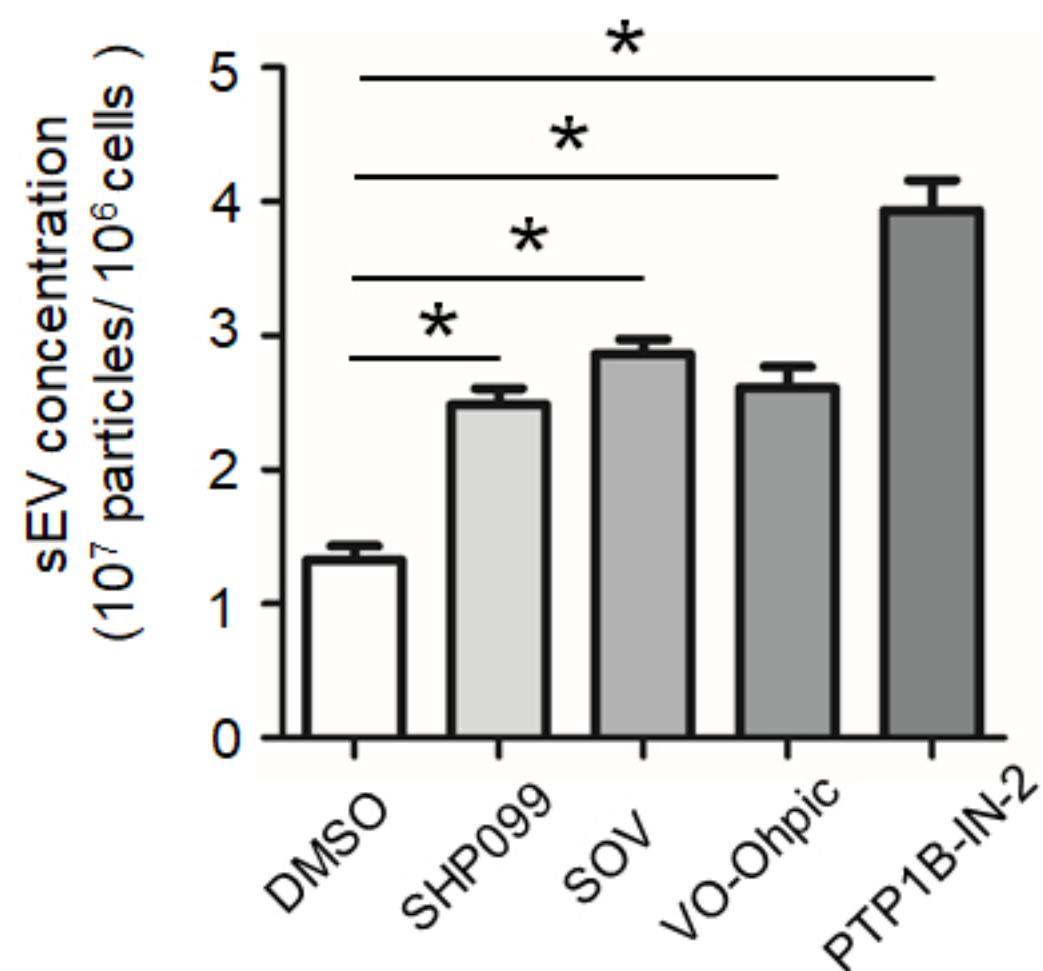

## B

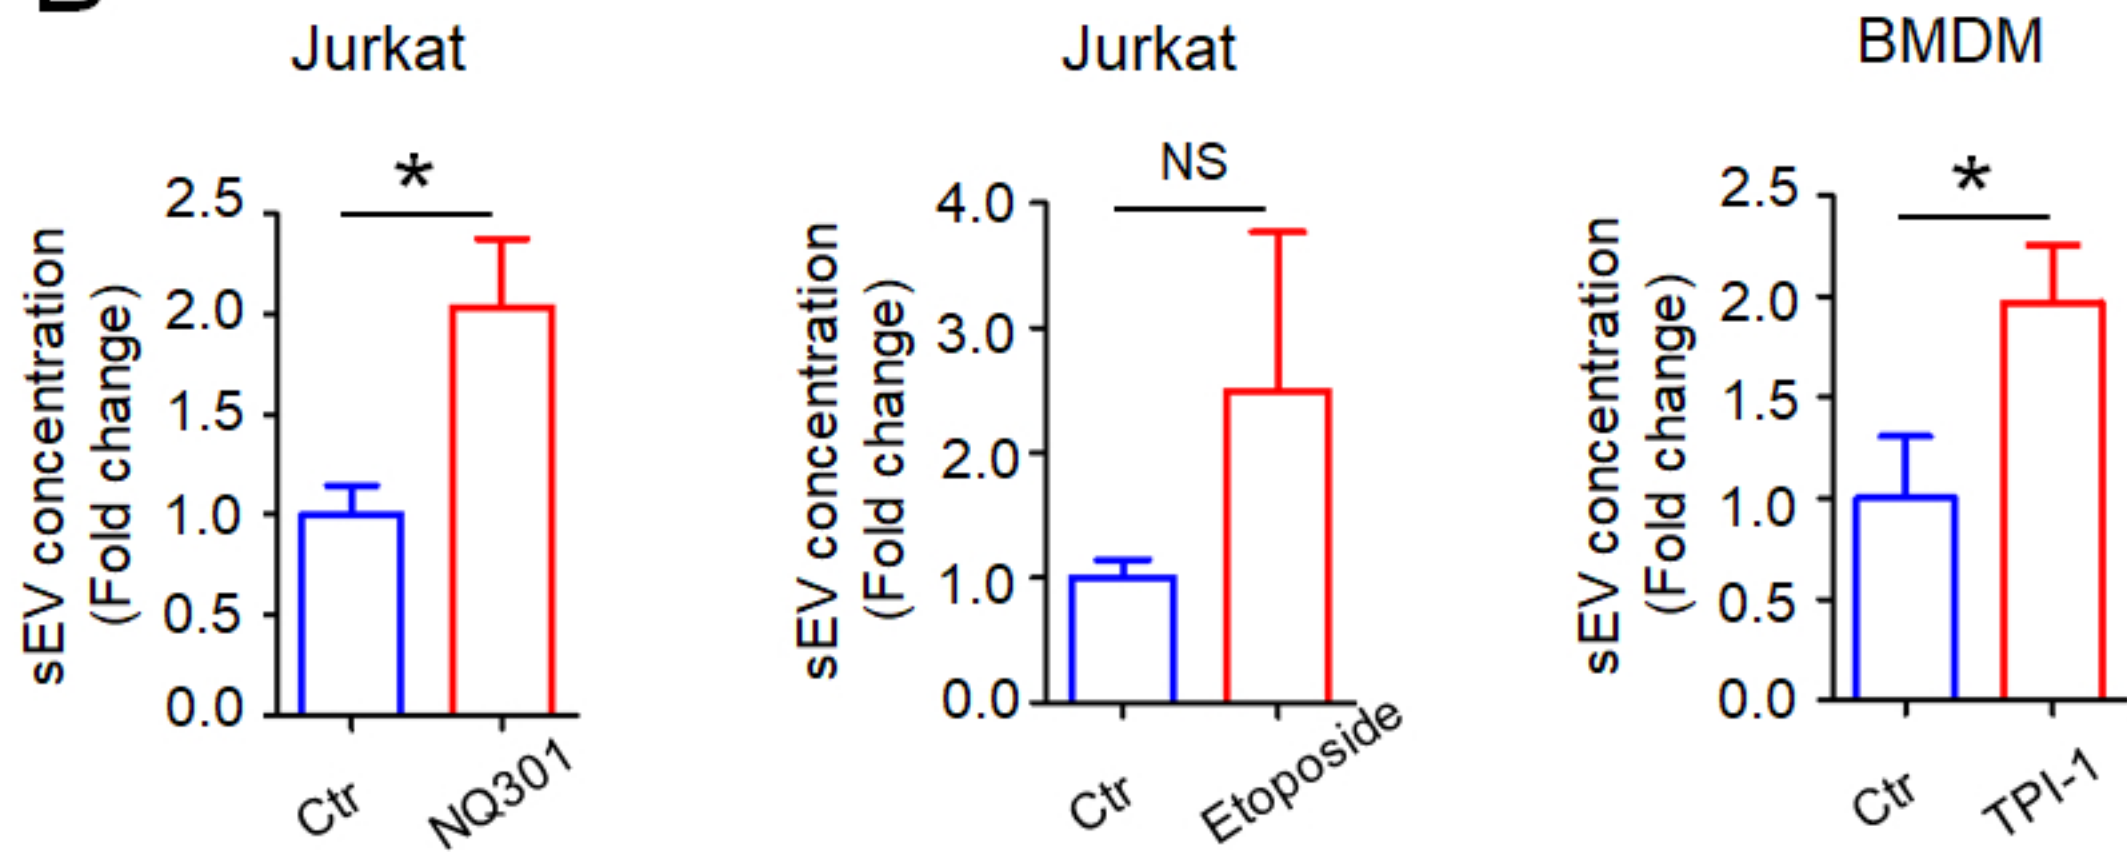

# Figure S3

## A

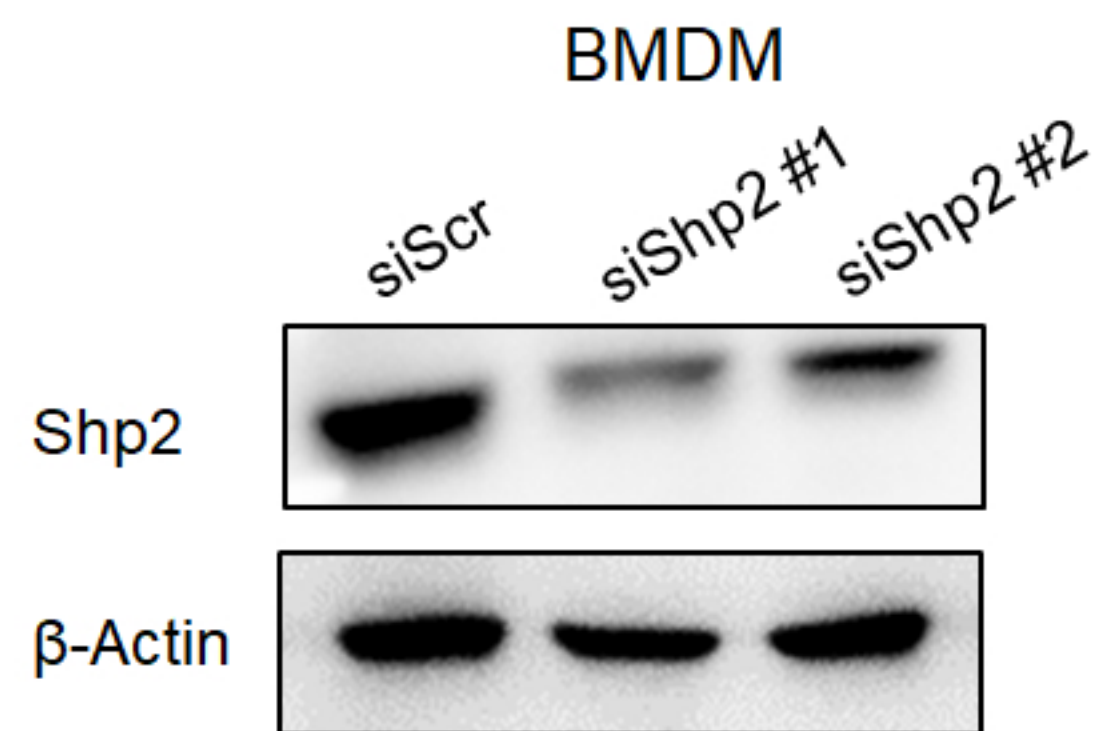

## B

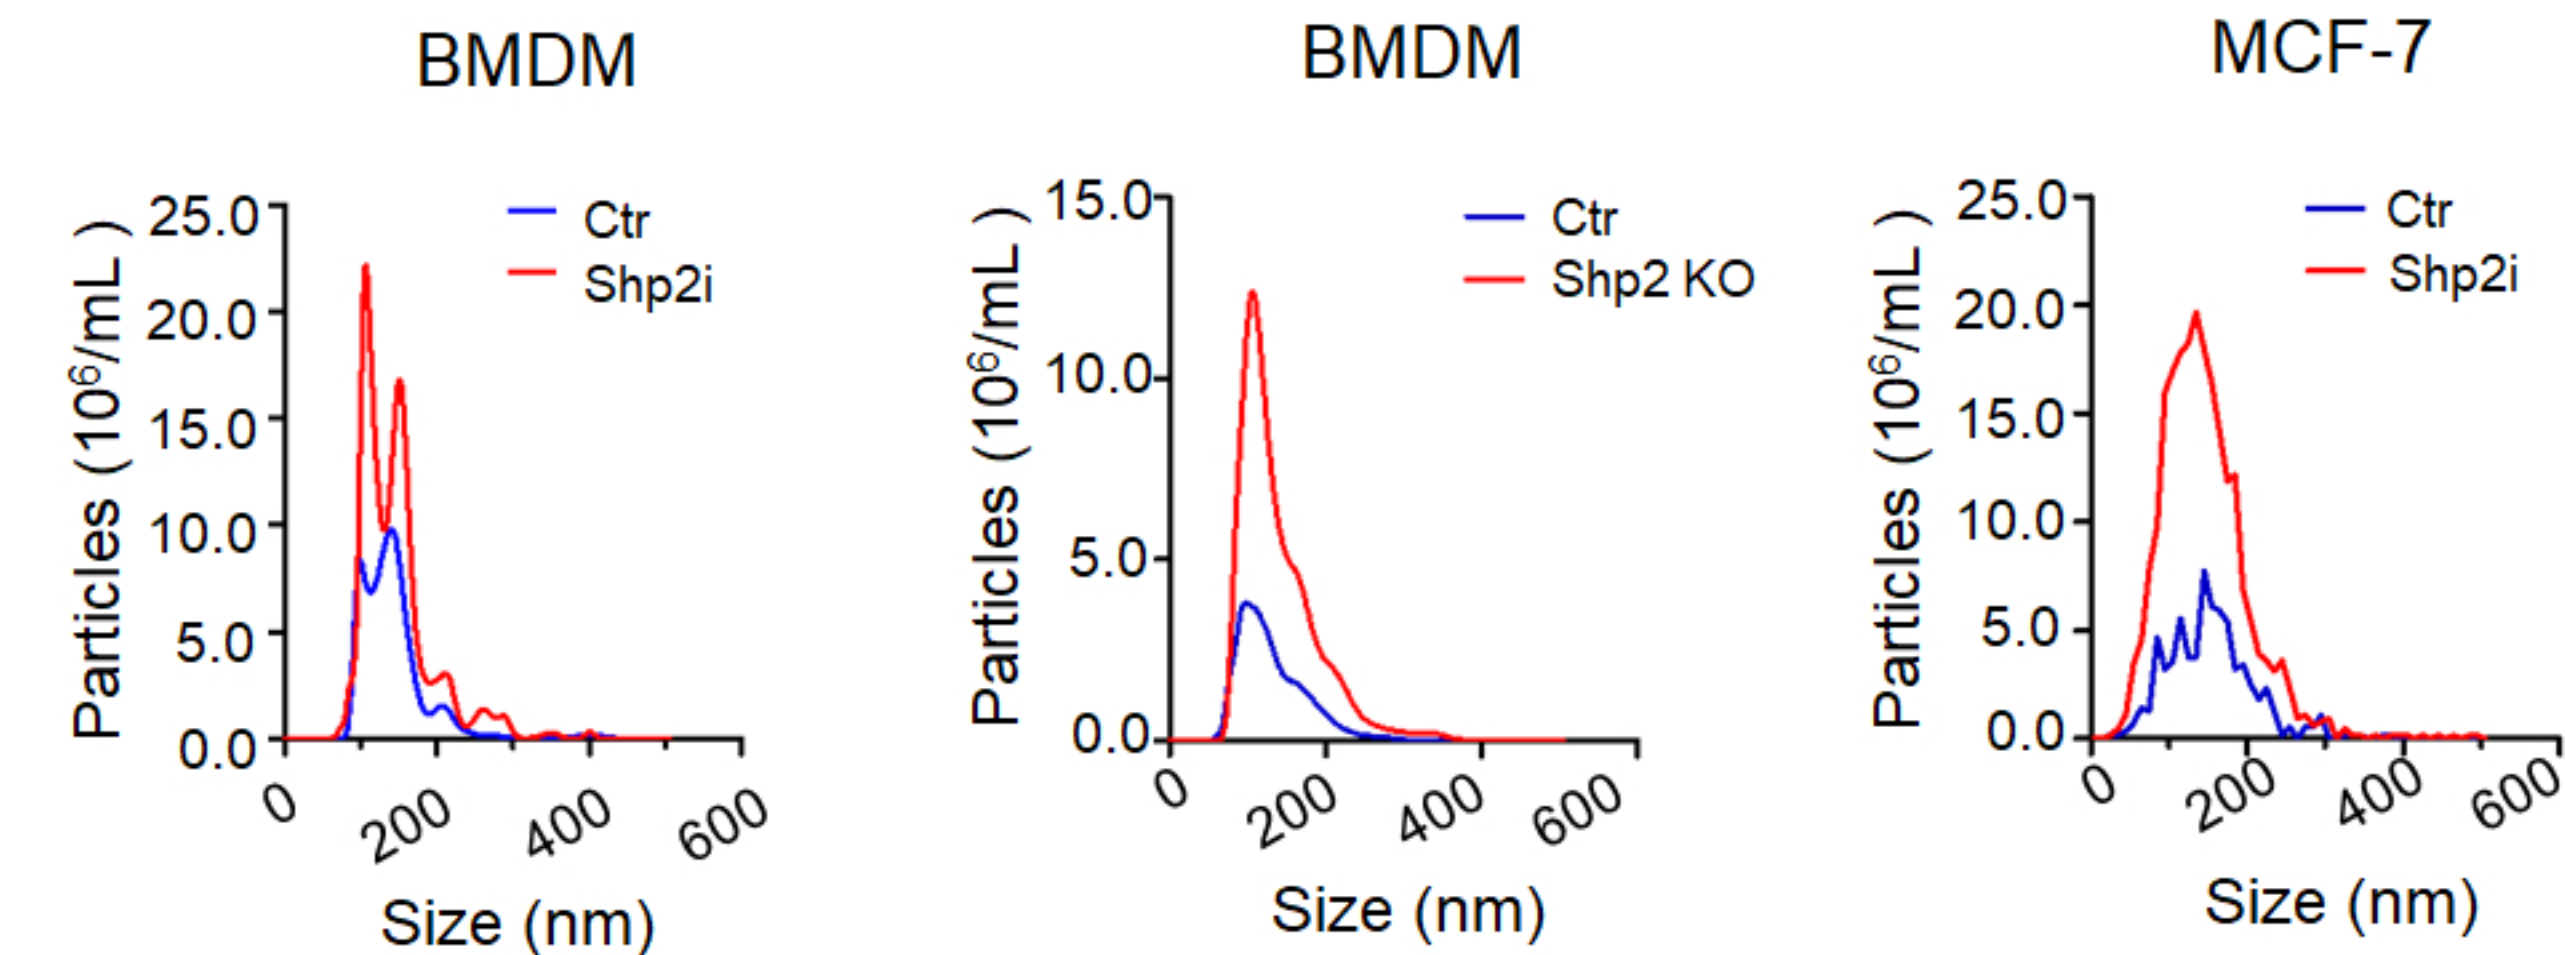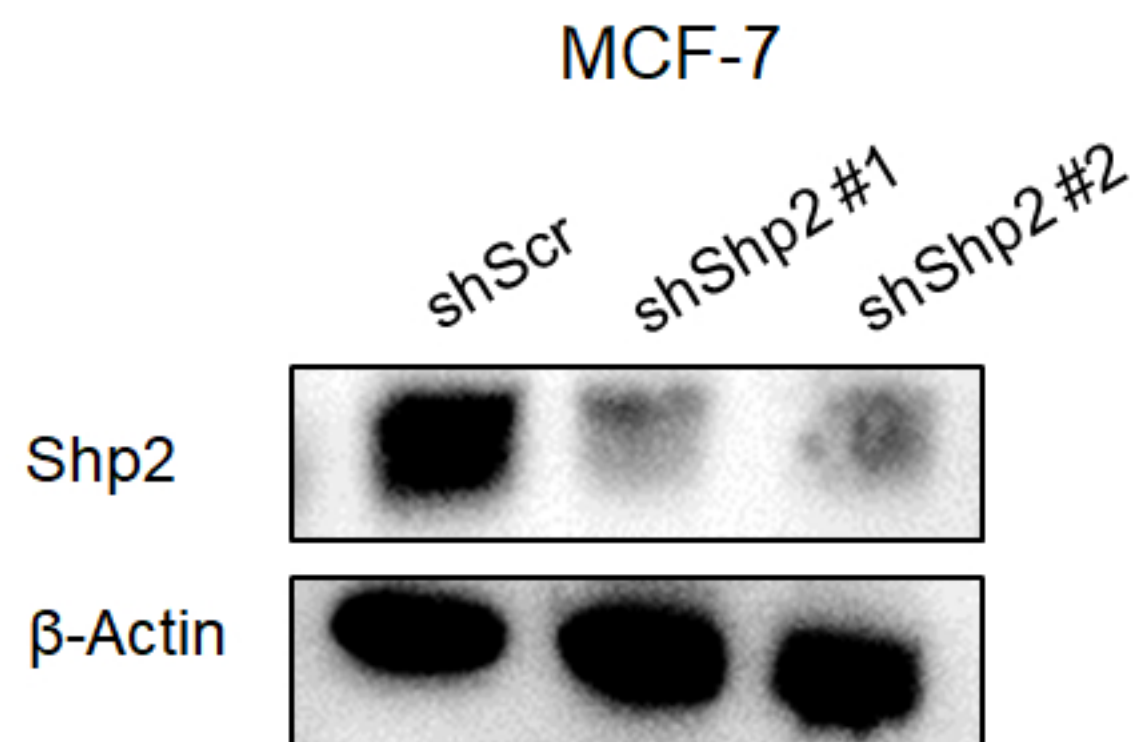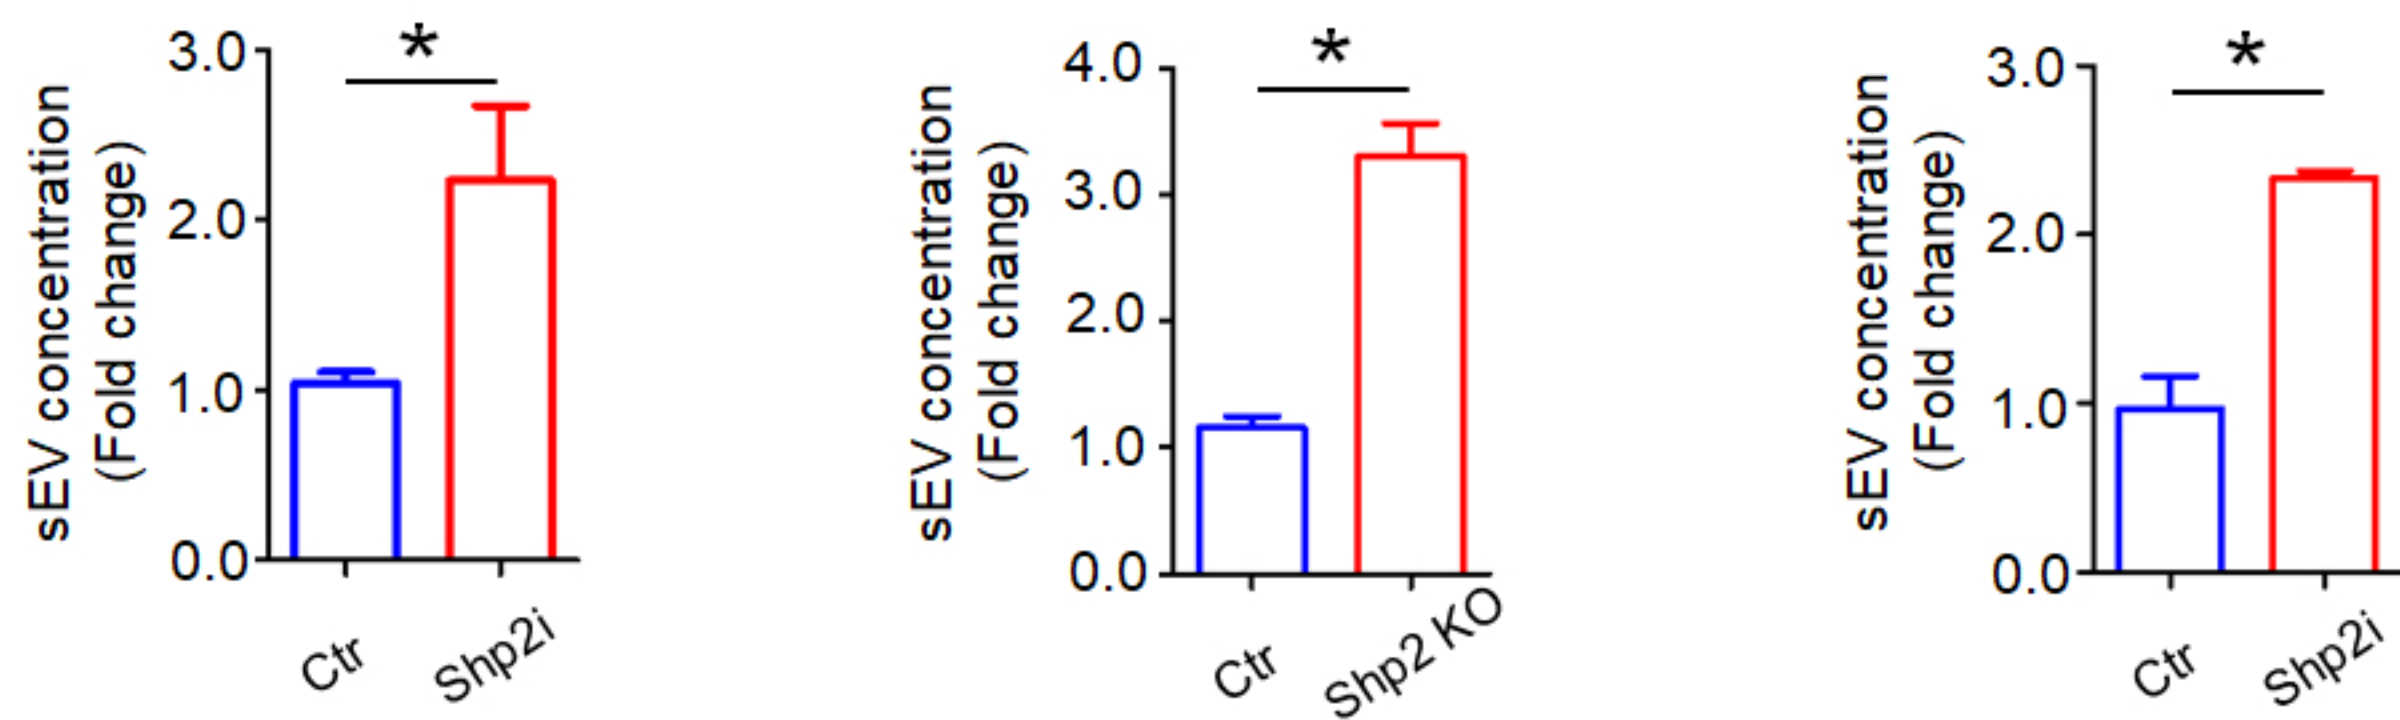

# Figure S4

## A

SPC-Cre<sup>+/-</sup> Shp2<sup>Flox/Flox</sup>  
Shp2<sup>Flox/Flox</sup>  
SPC-Cre<sup>+/-</sup> Shp2<sup>Flox/Flox</sup>  
SPC-Cre<sup>+/-</sup> Shp2<sup>Flox/Flox</sup>  
SPC-Cre<sup>+/-</sup> Shp2<sup>Flox/Flox</sup>

WT →  
SPC-Cre →

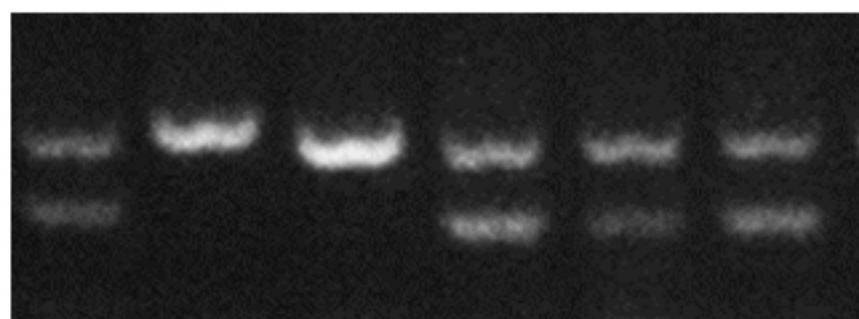

Shp2 Flox →

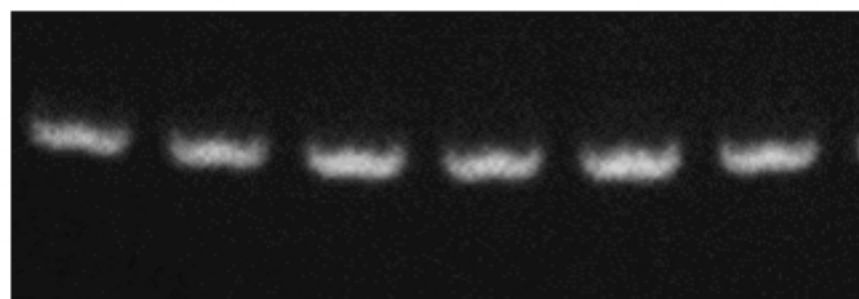

## B

DAPI

SPC

Shp2

Merge

Ctrl

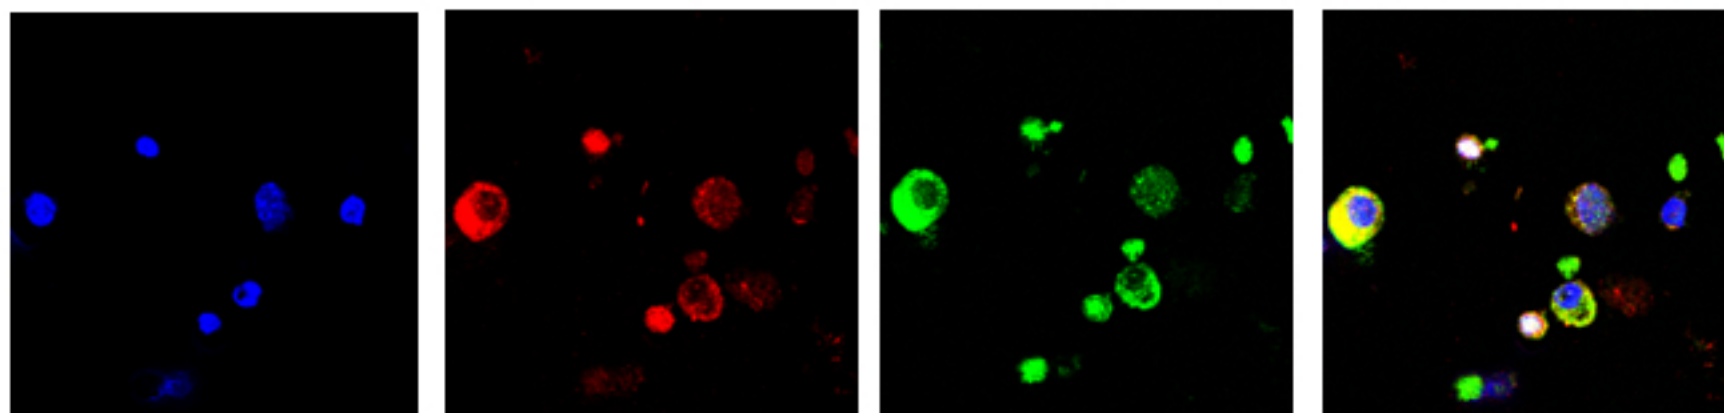

cKO

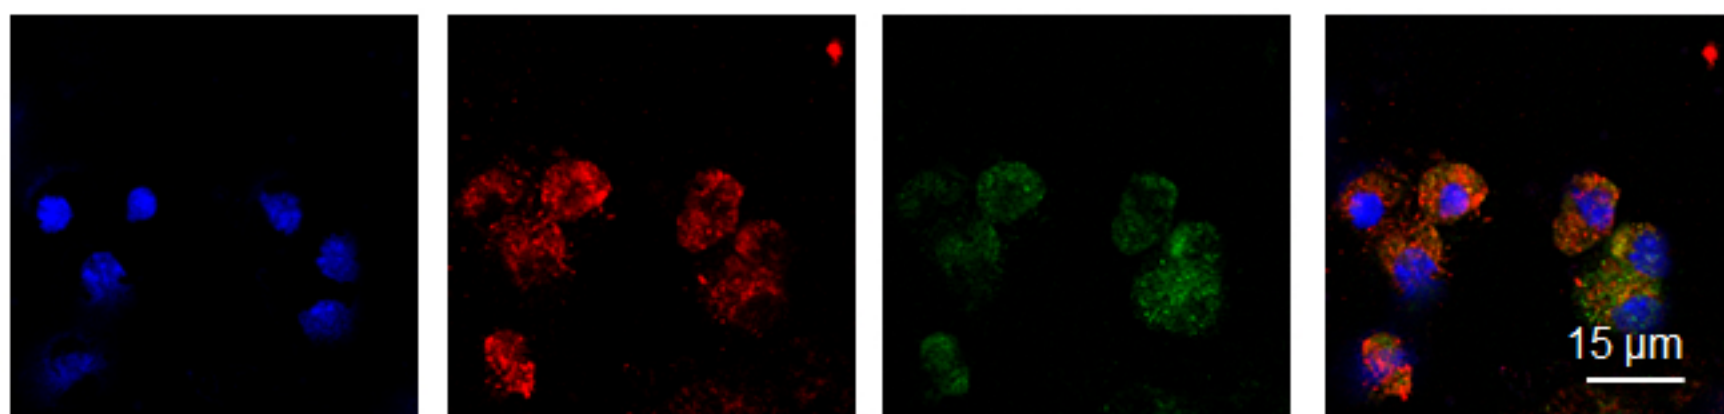



Figure S5

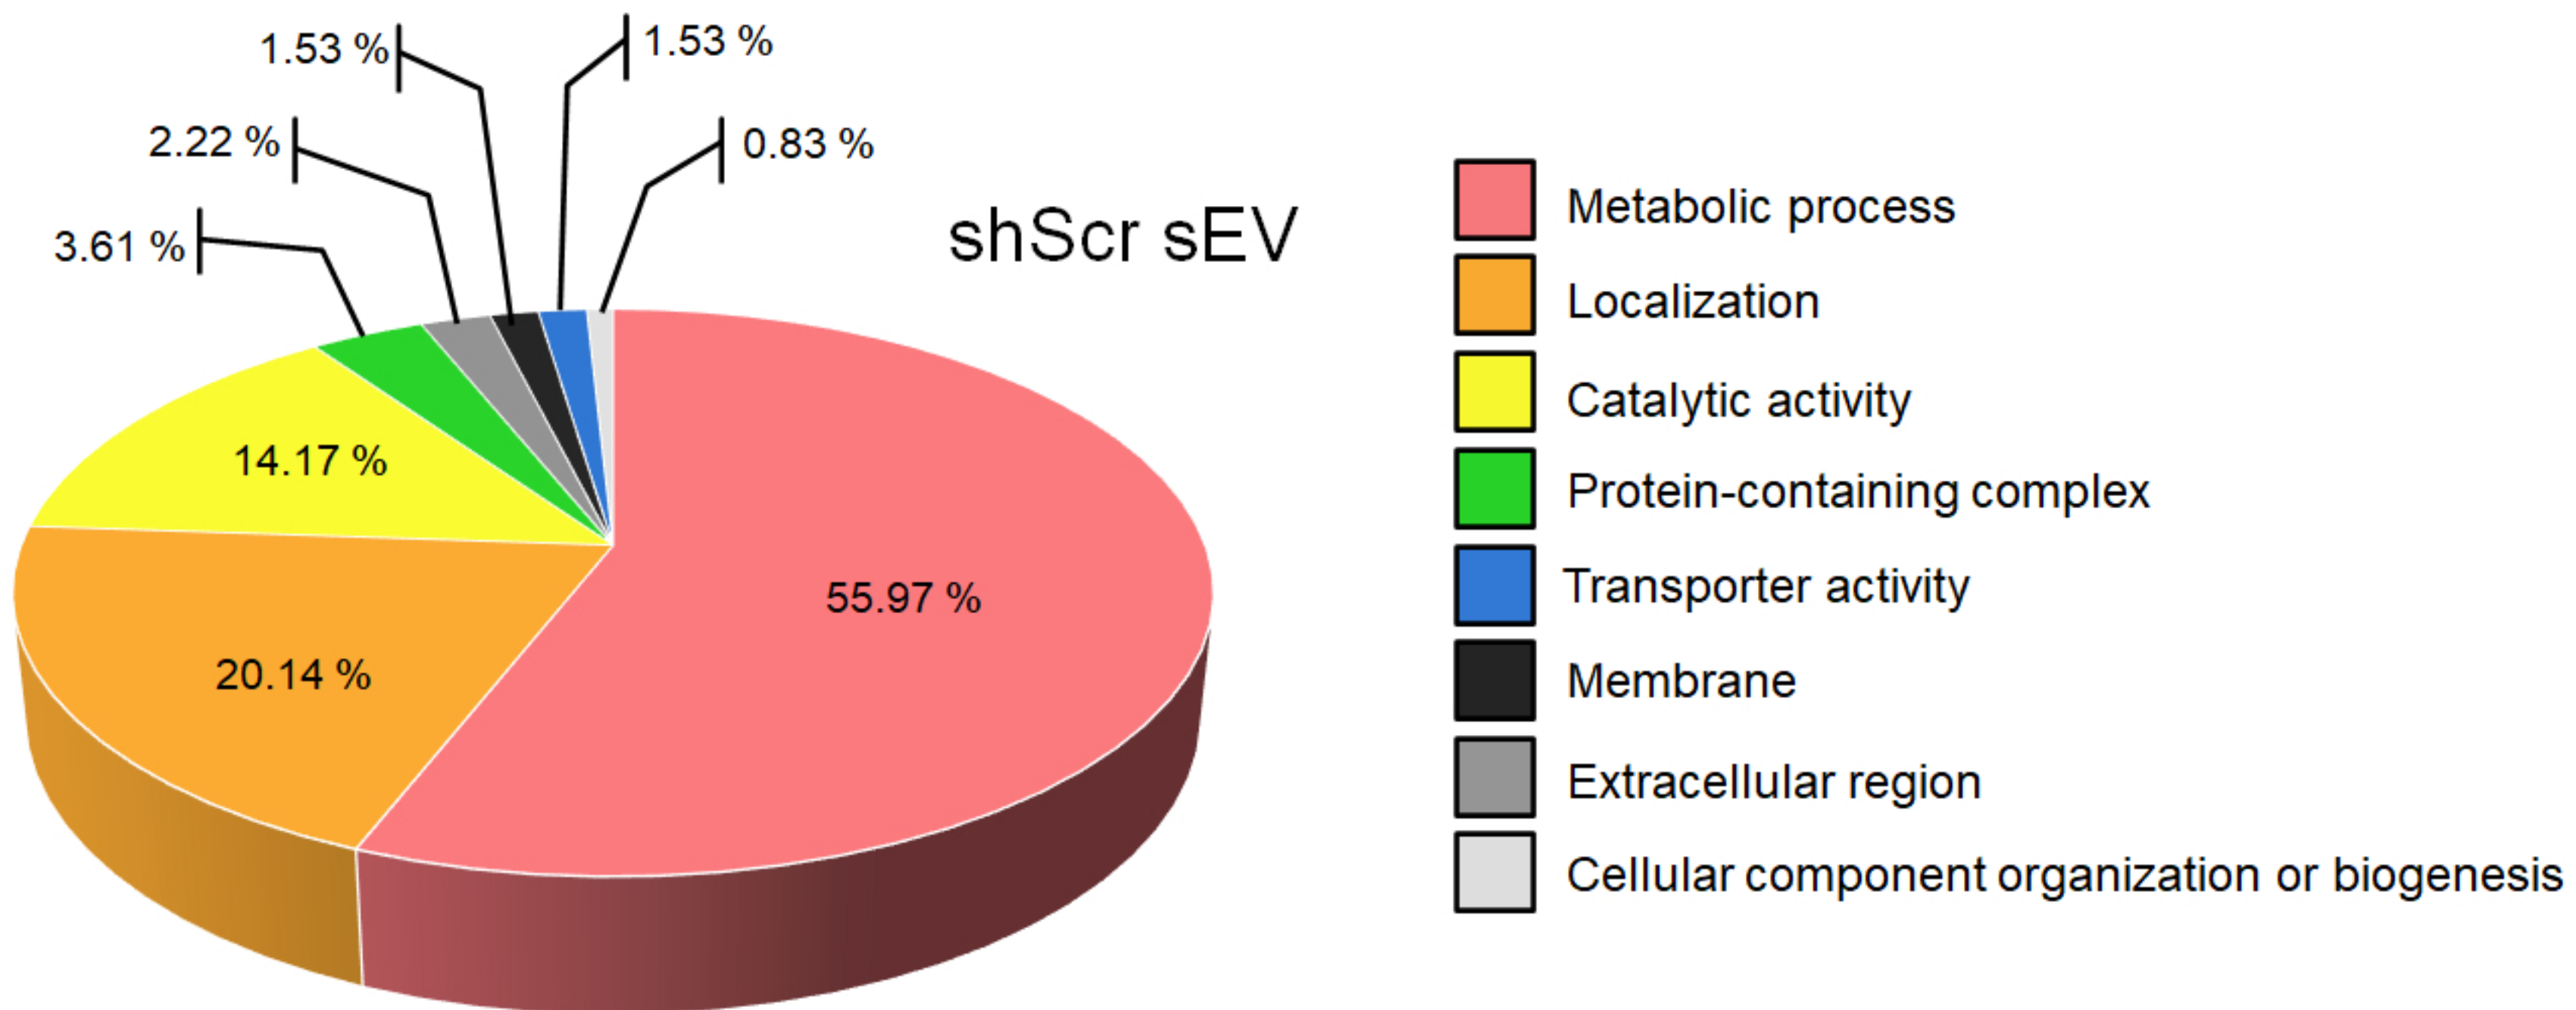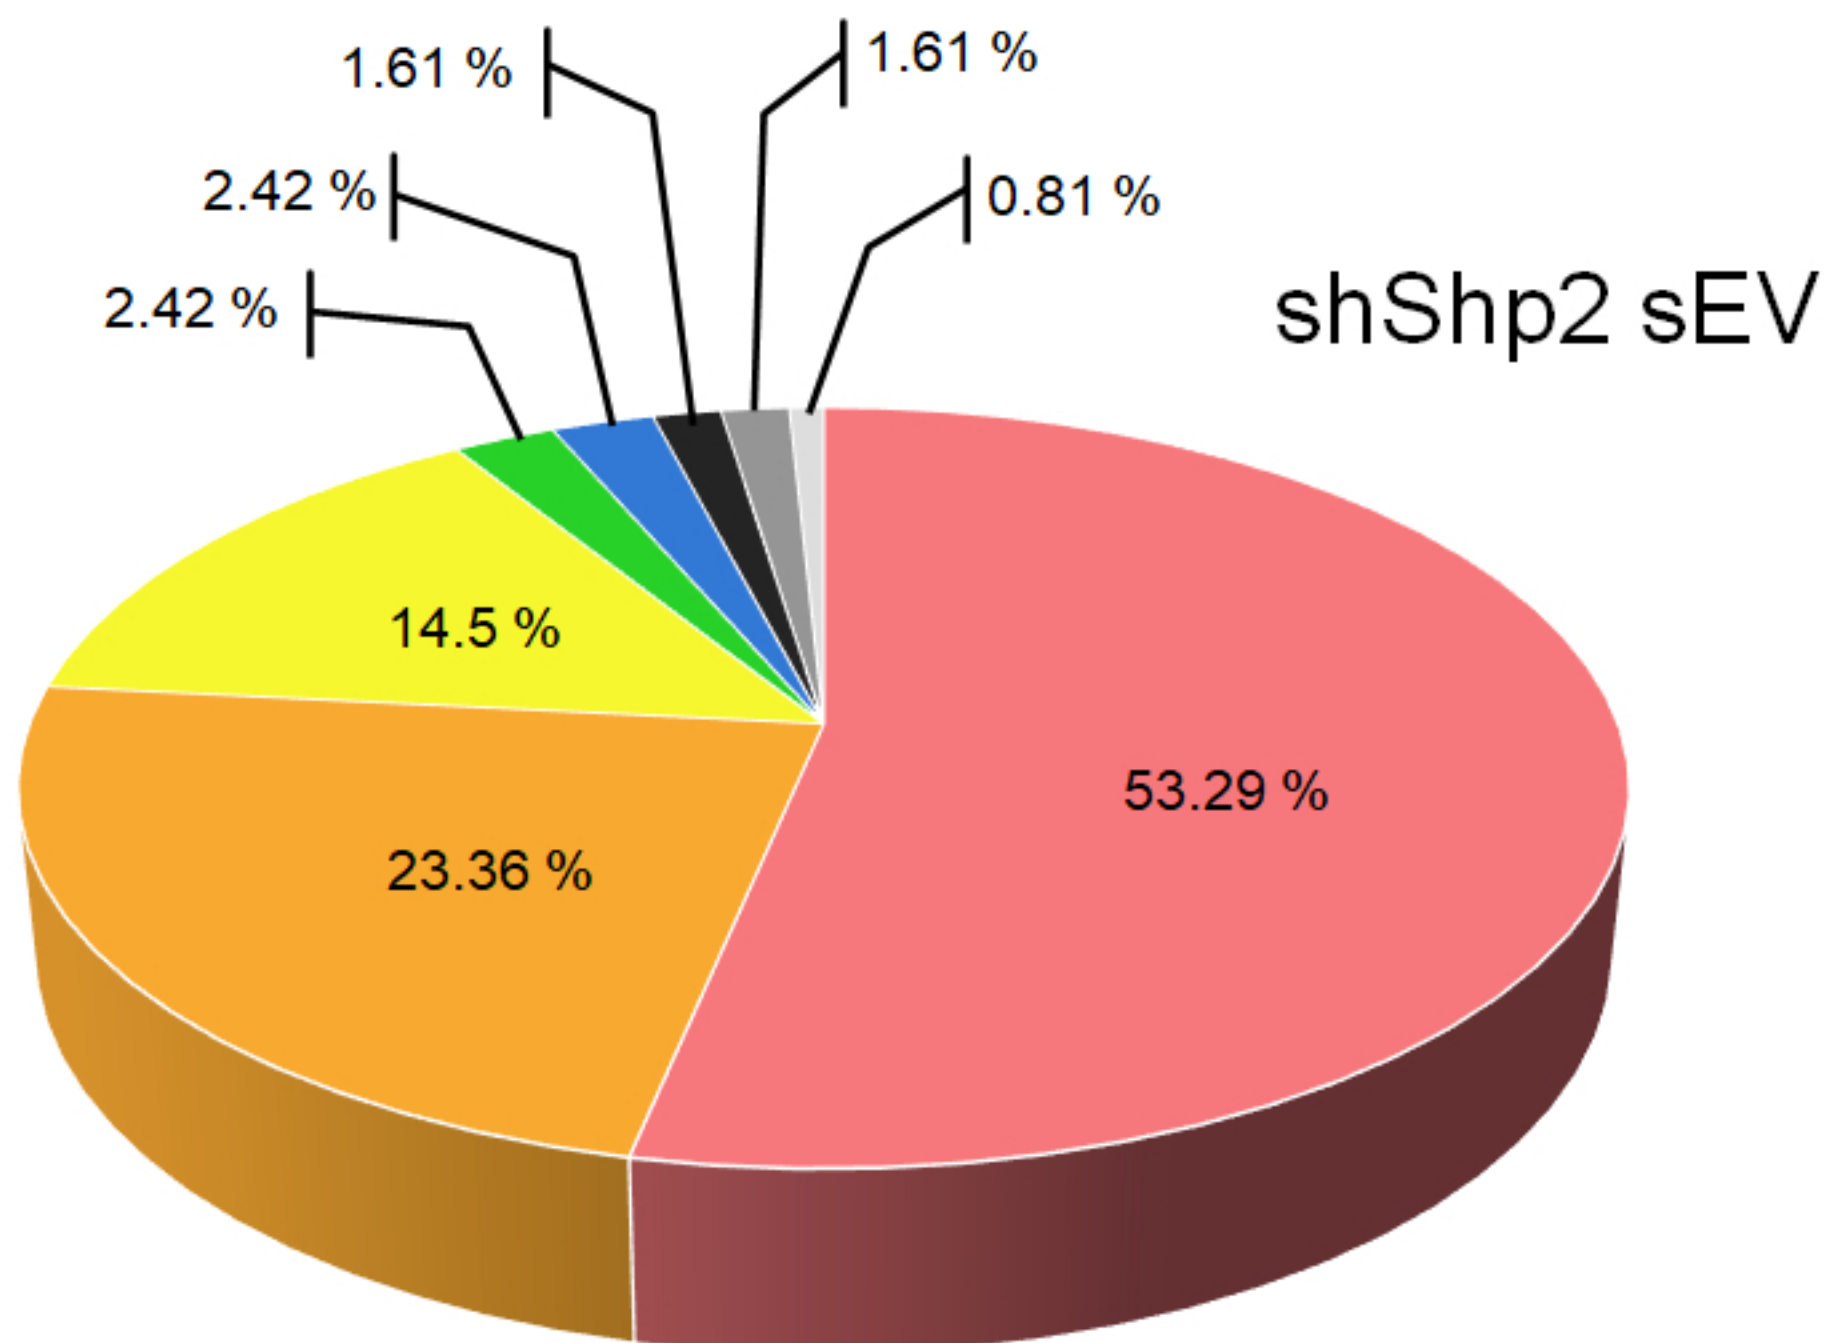

# Figure S6

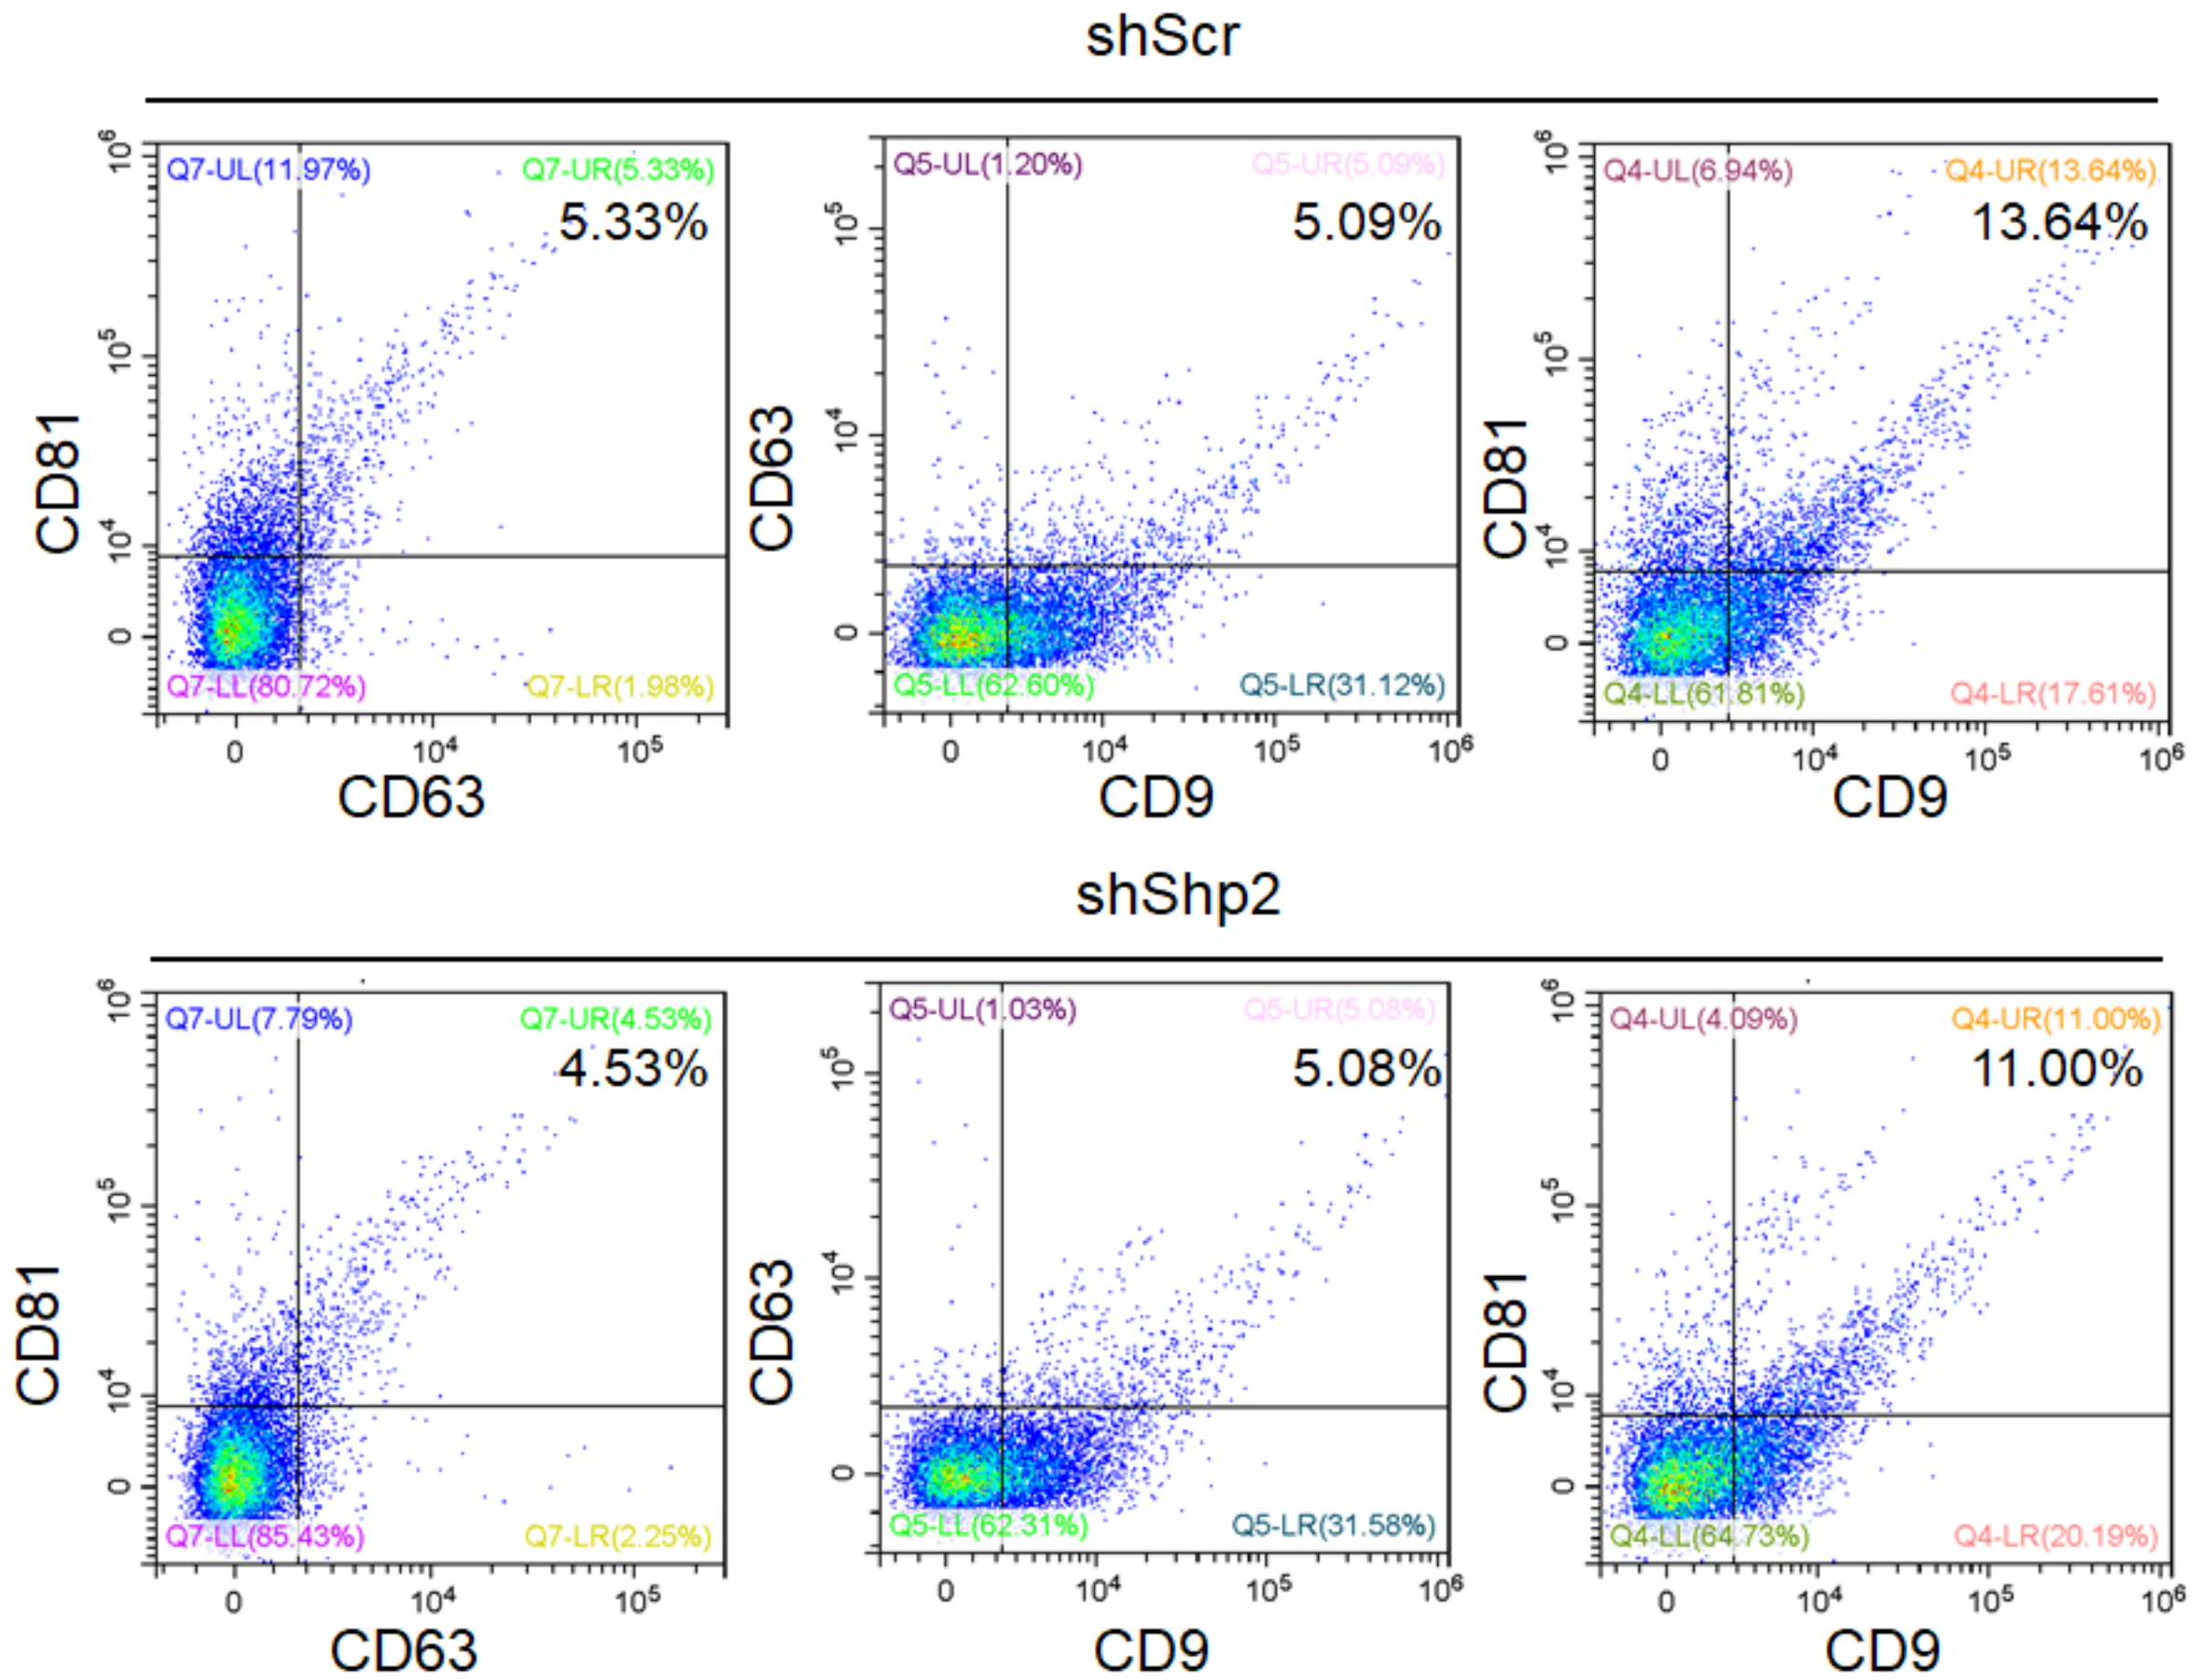

Figure S7

### Total proteins

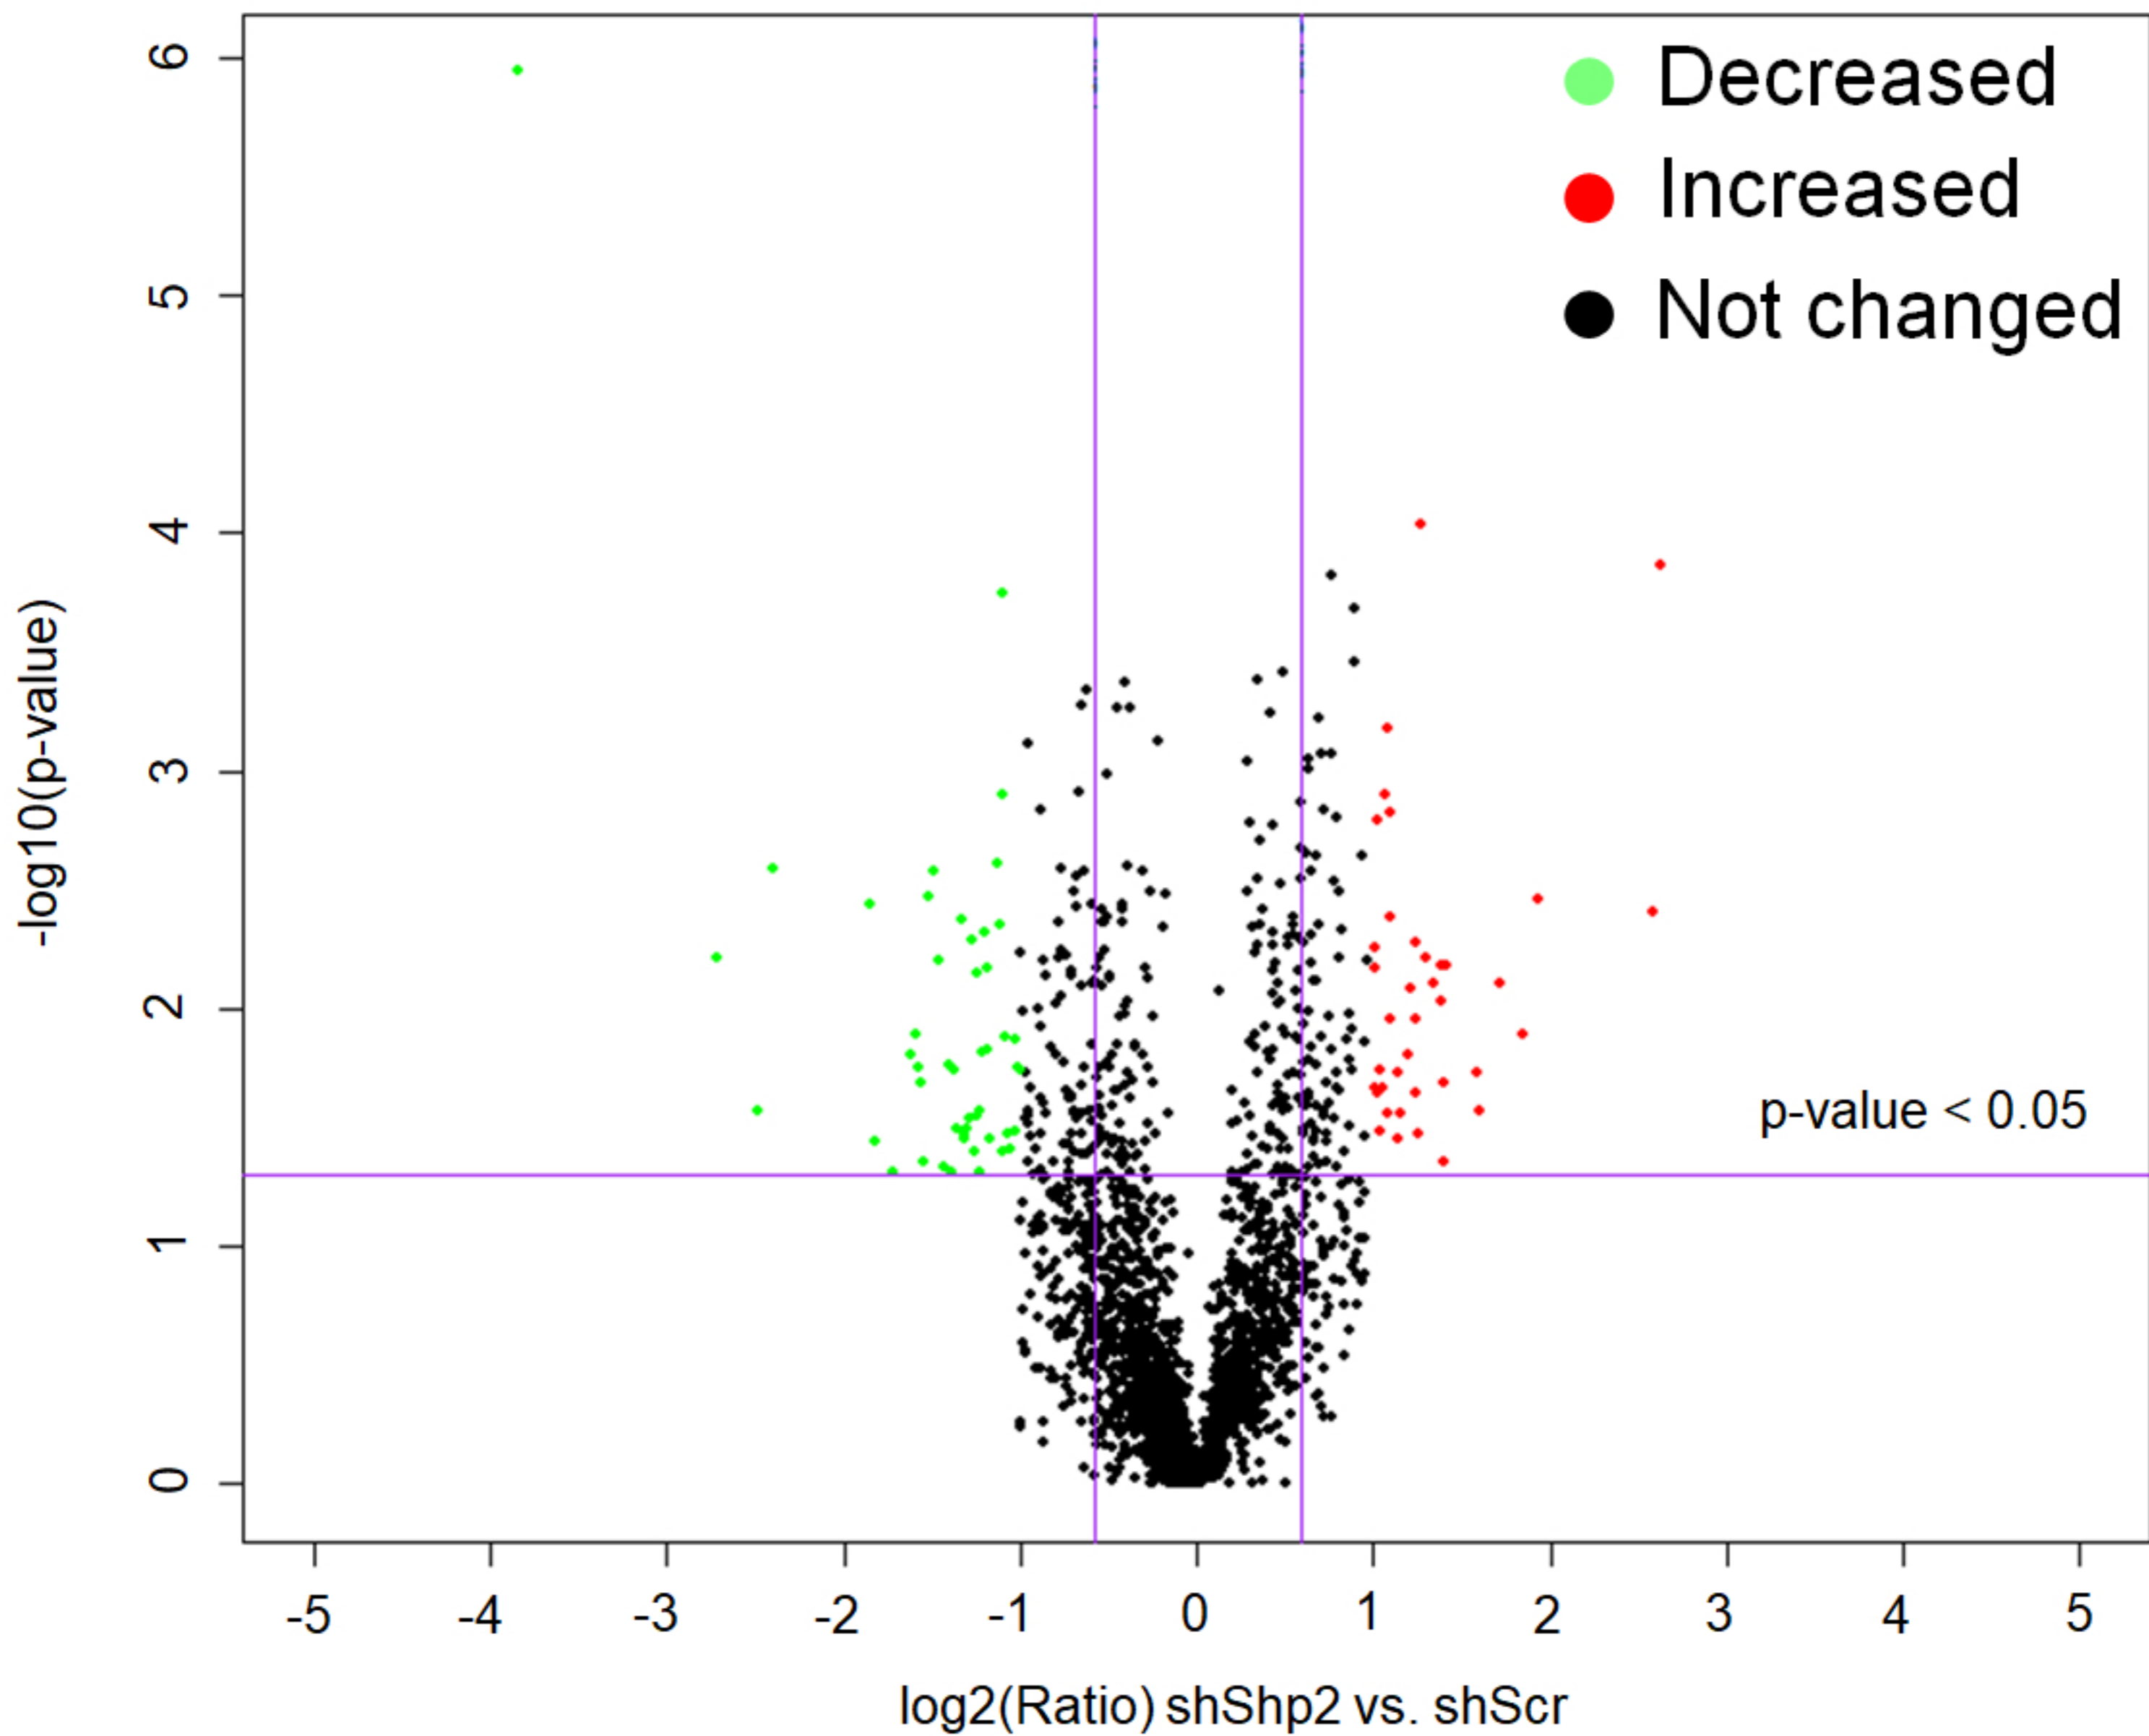

Figure S8

sEV related proteins

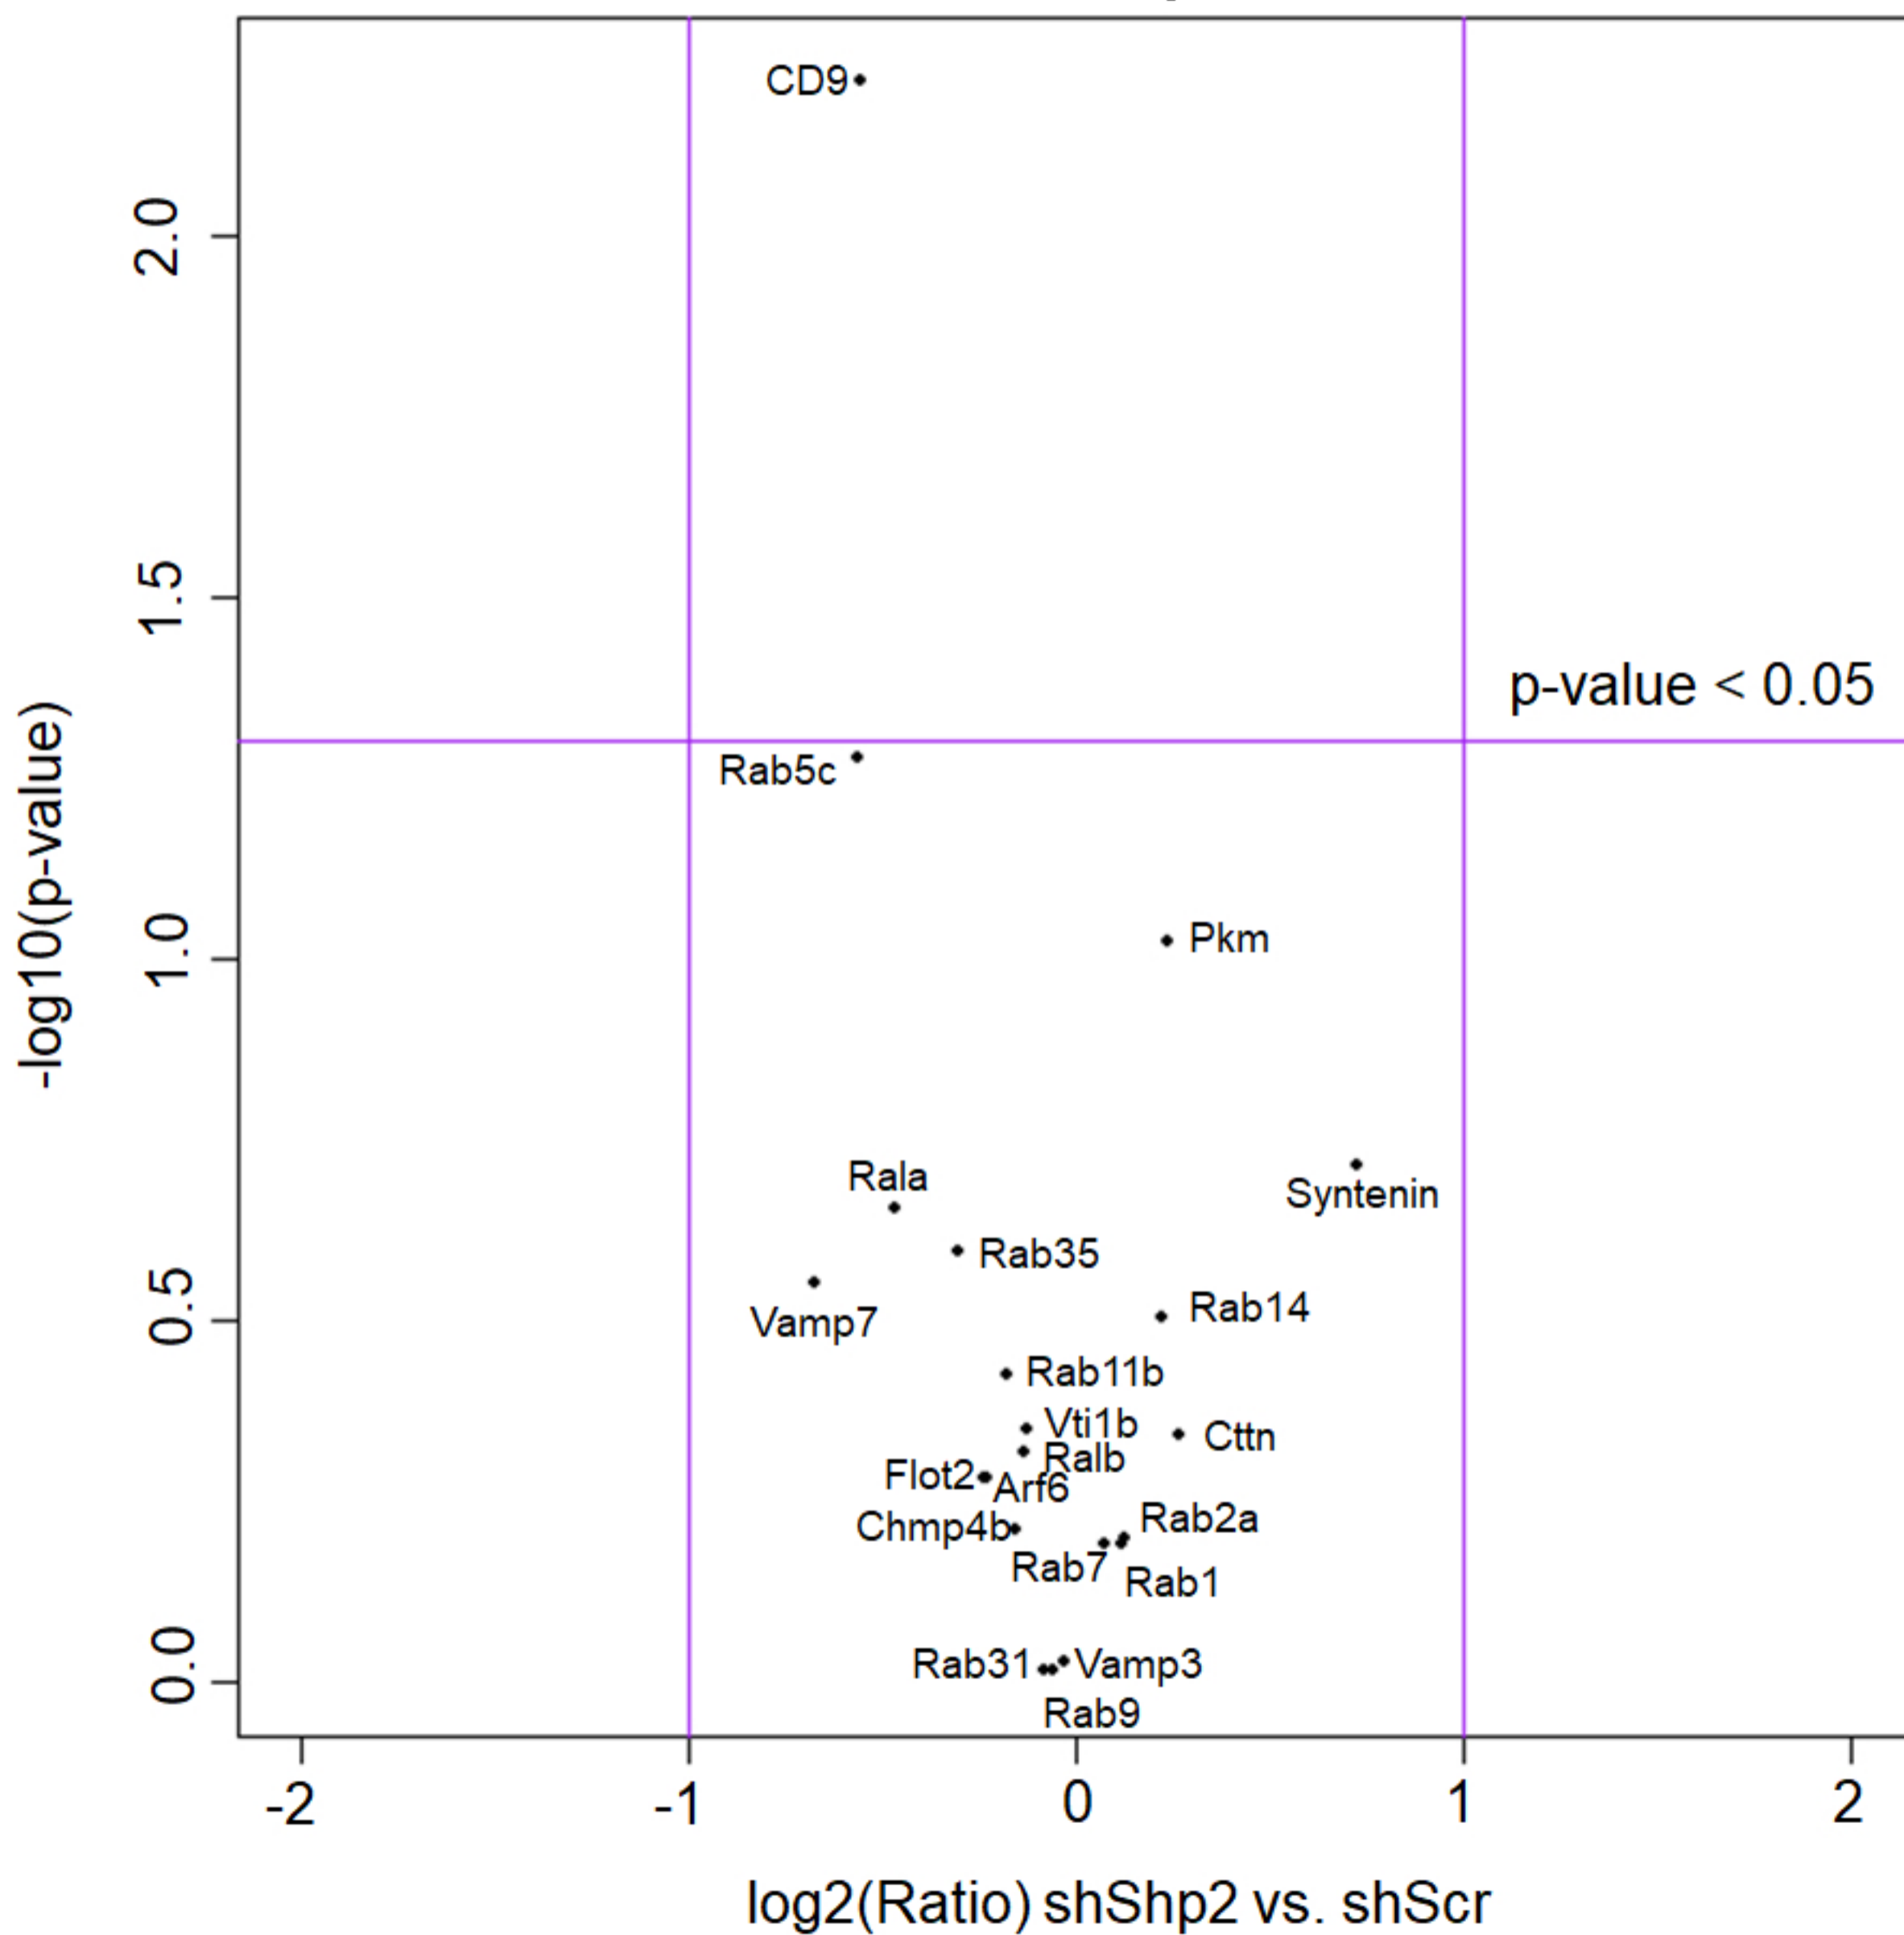



# Figure S9

## A

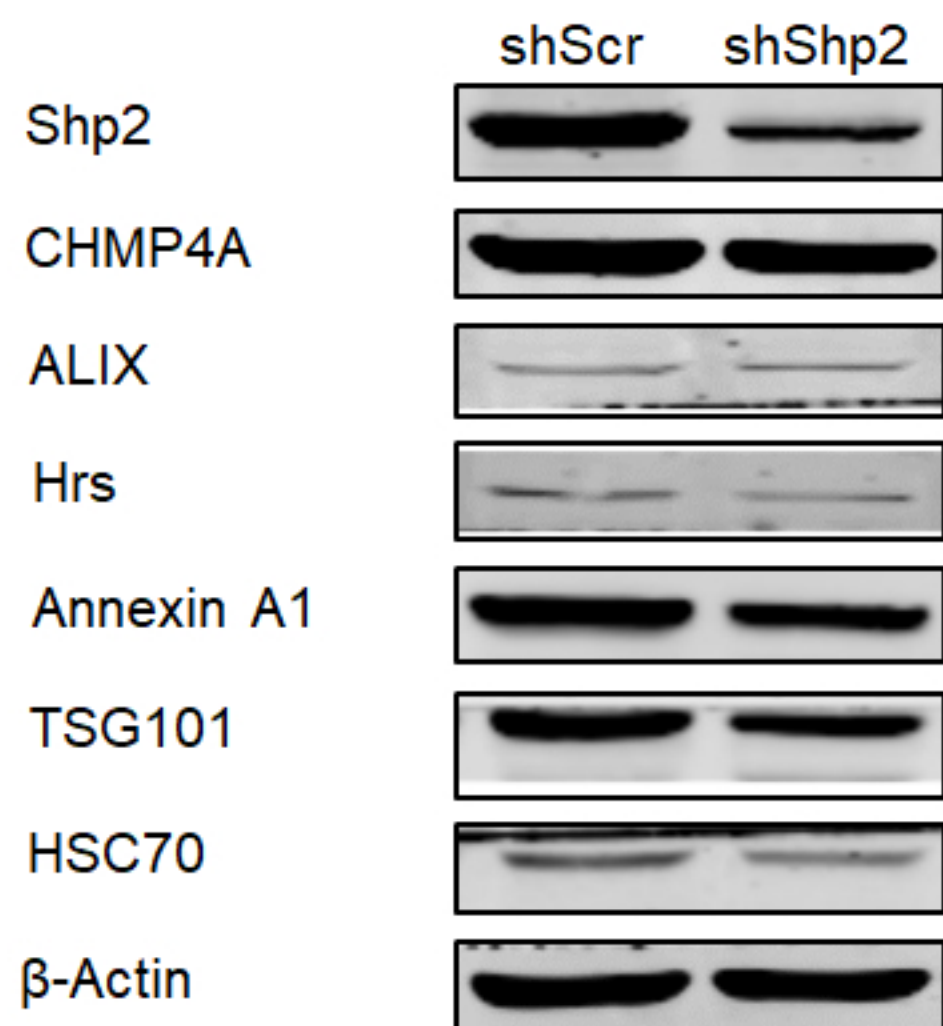

## B

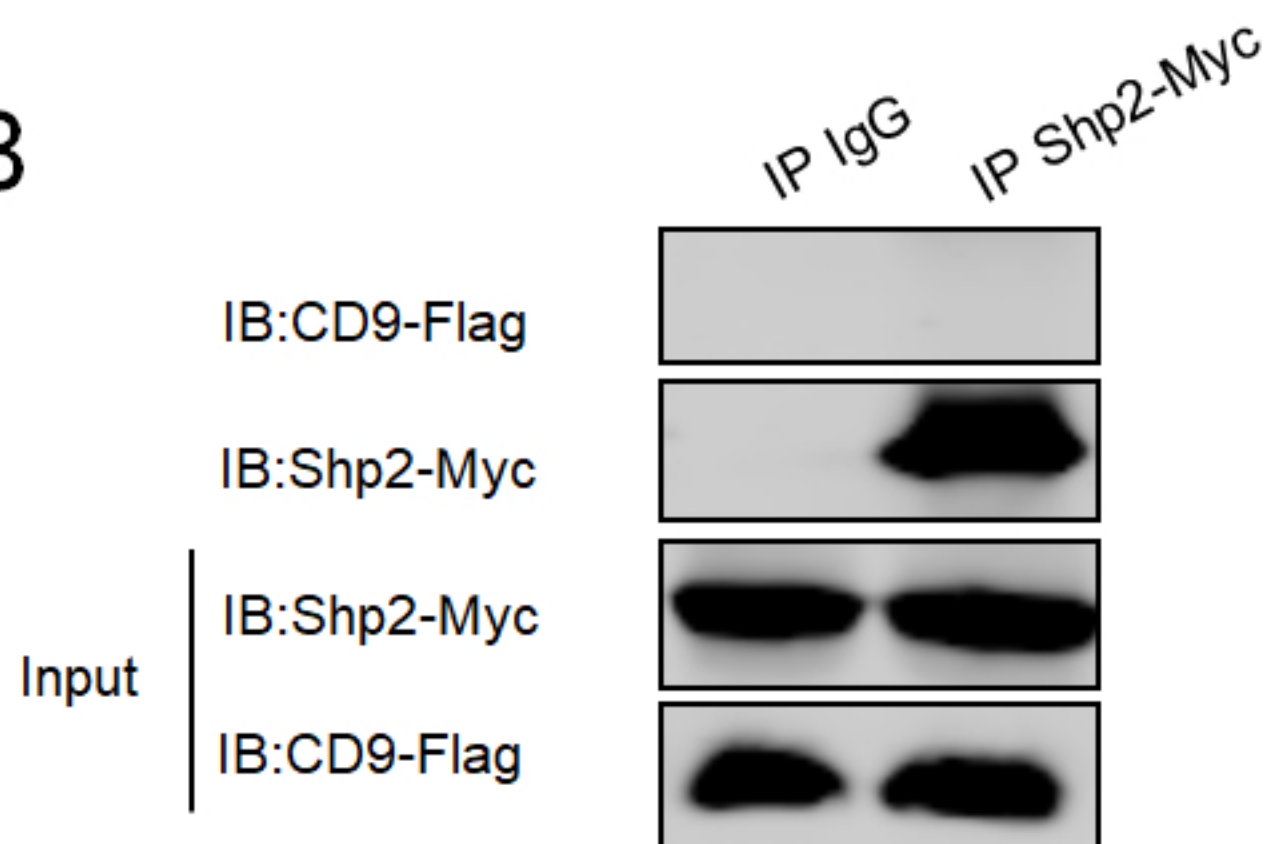

## C

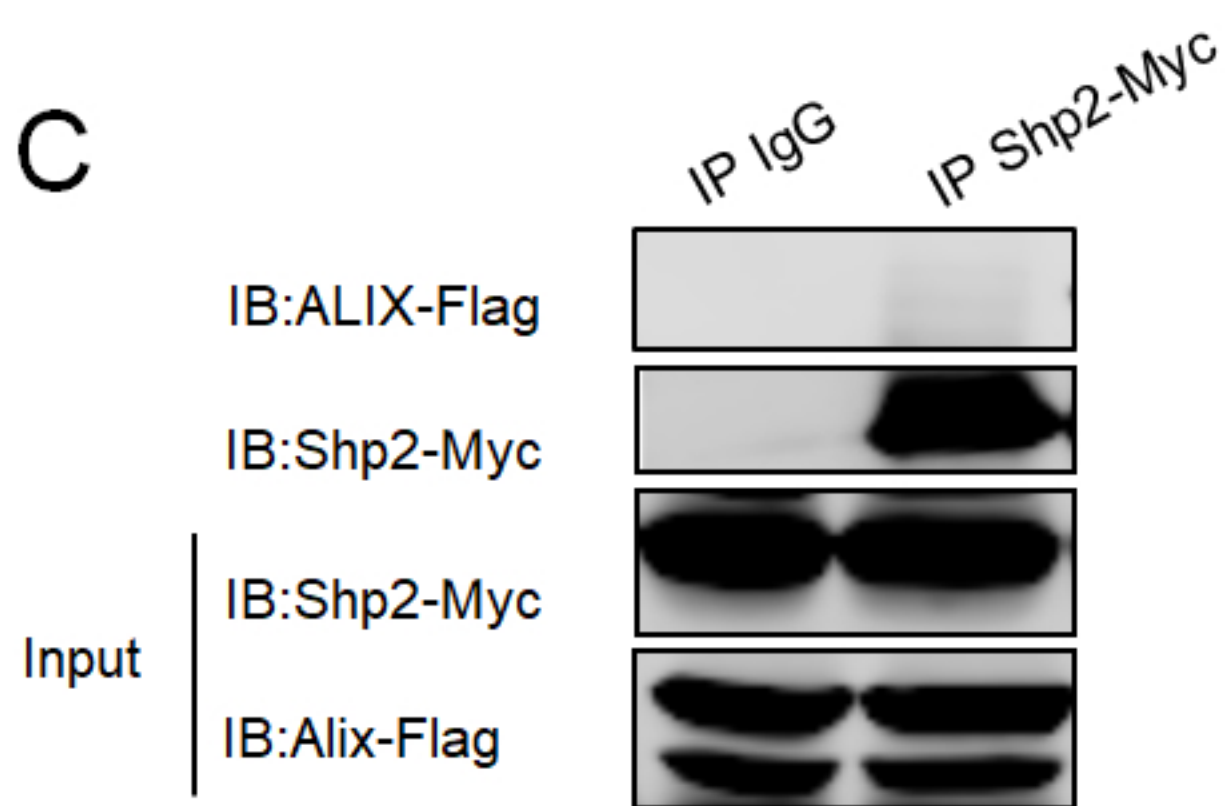

## D

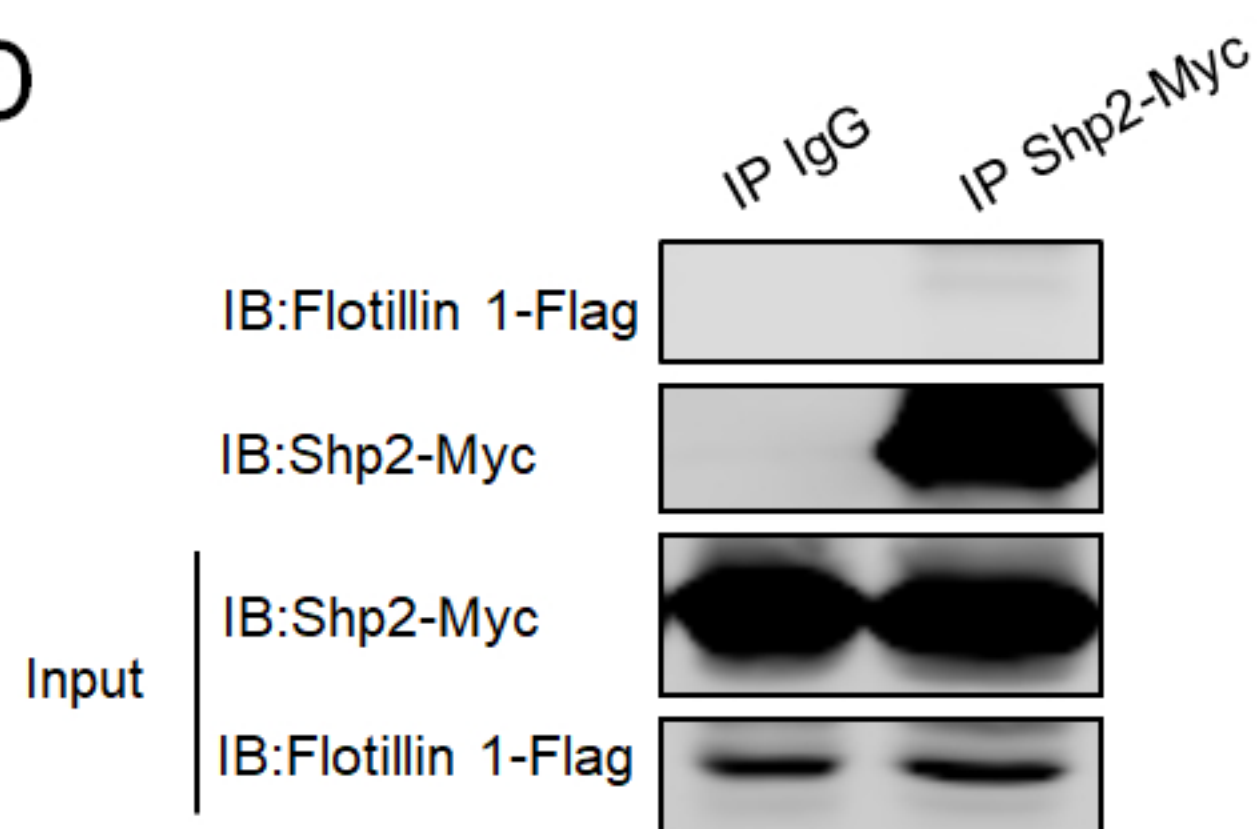

## E

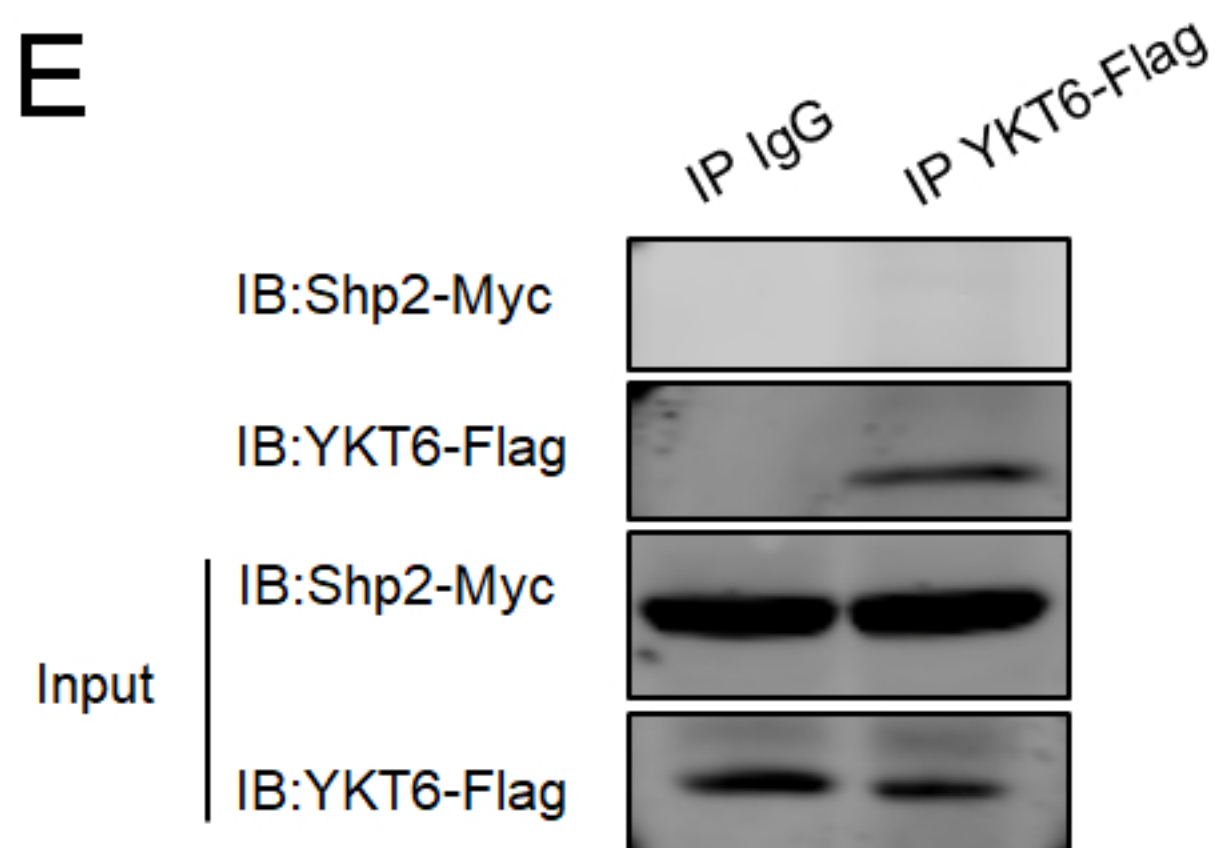

## F

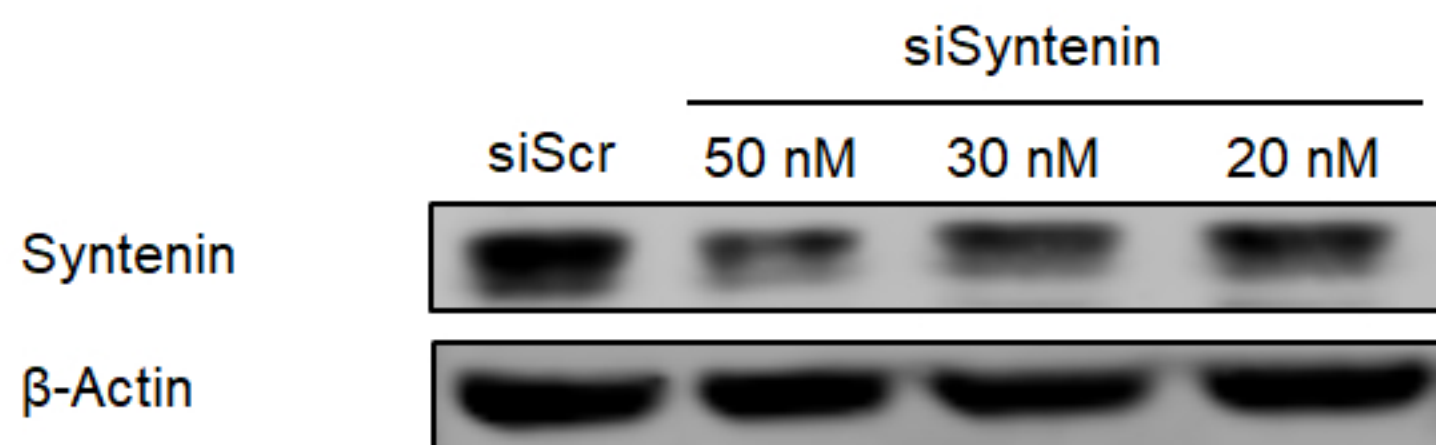

# Figure S10

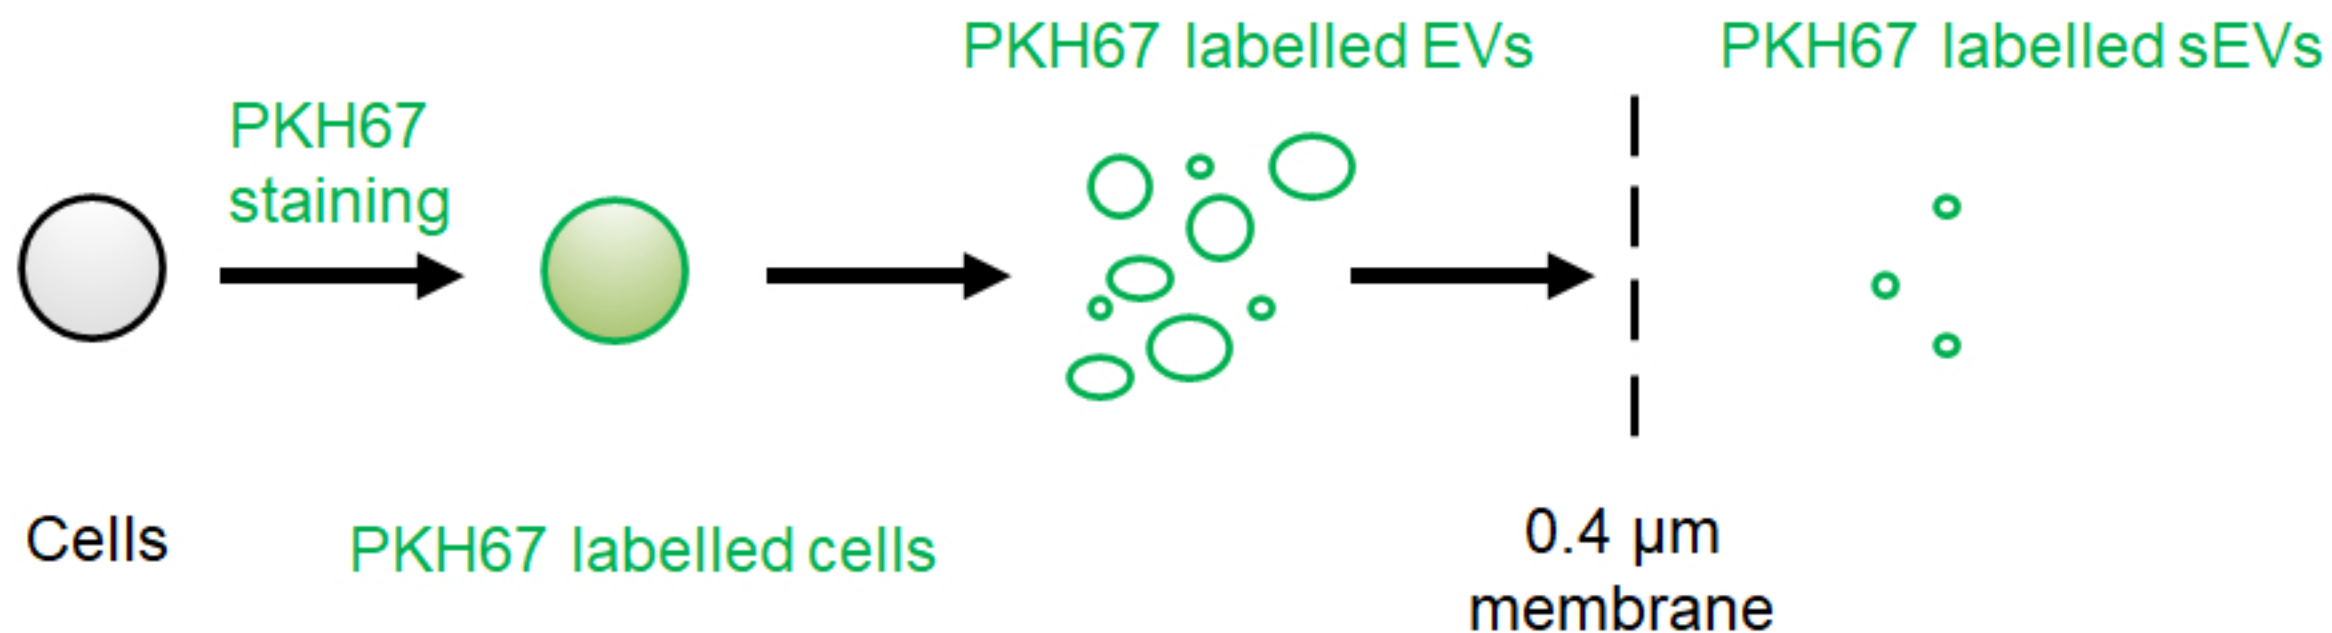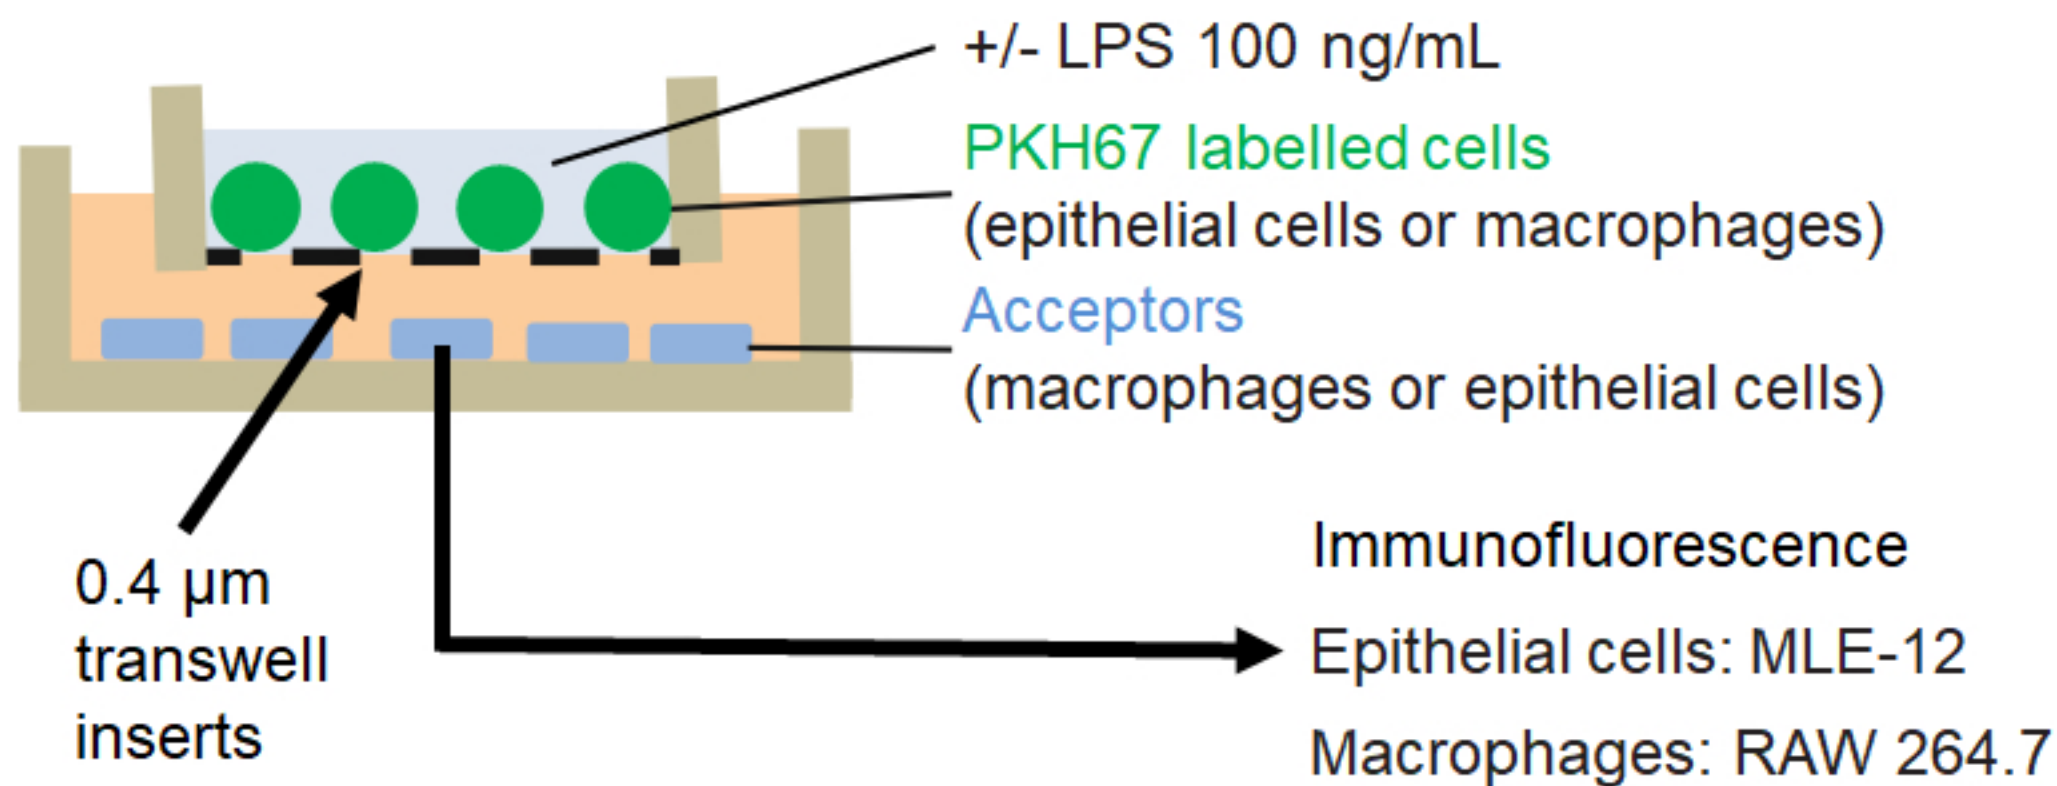

# Figure S11

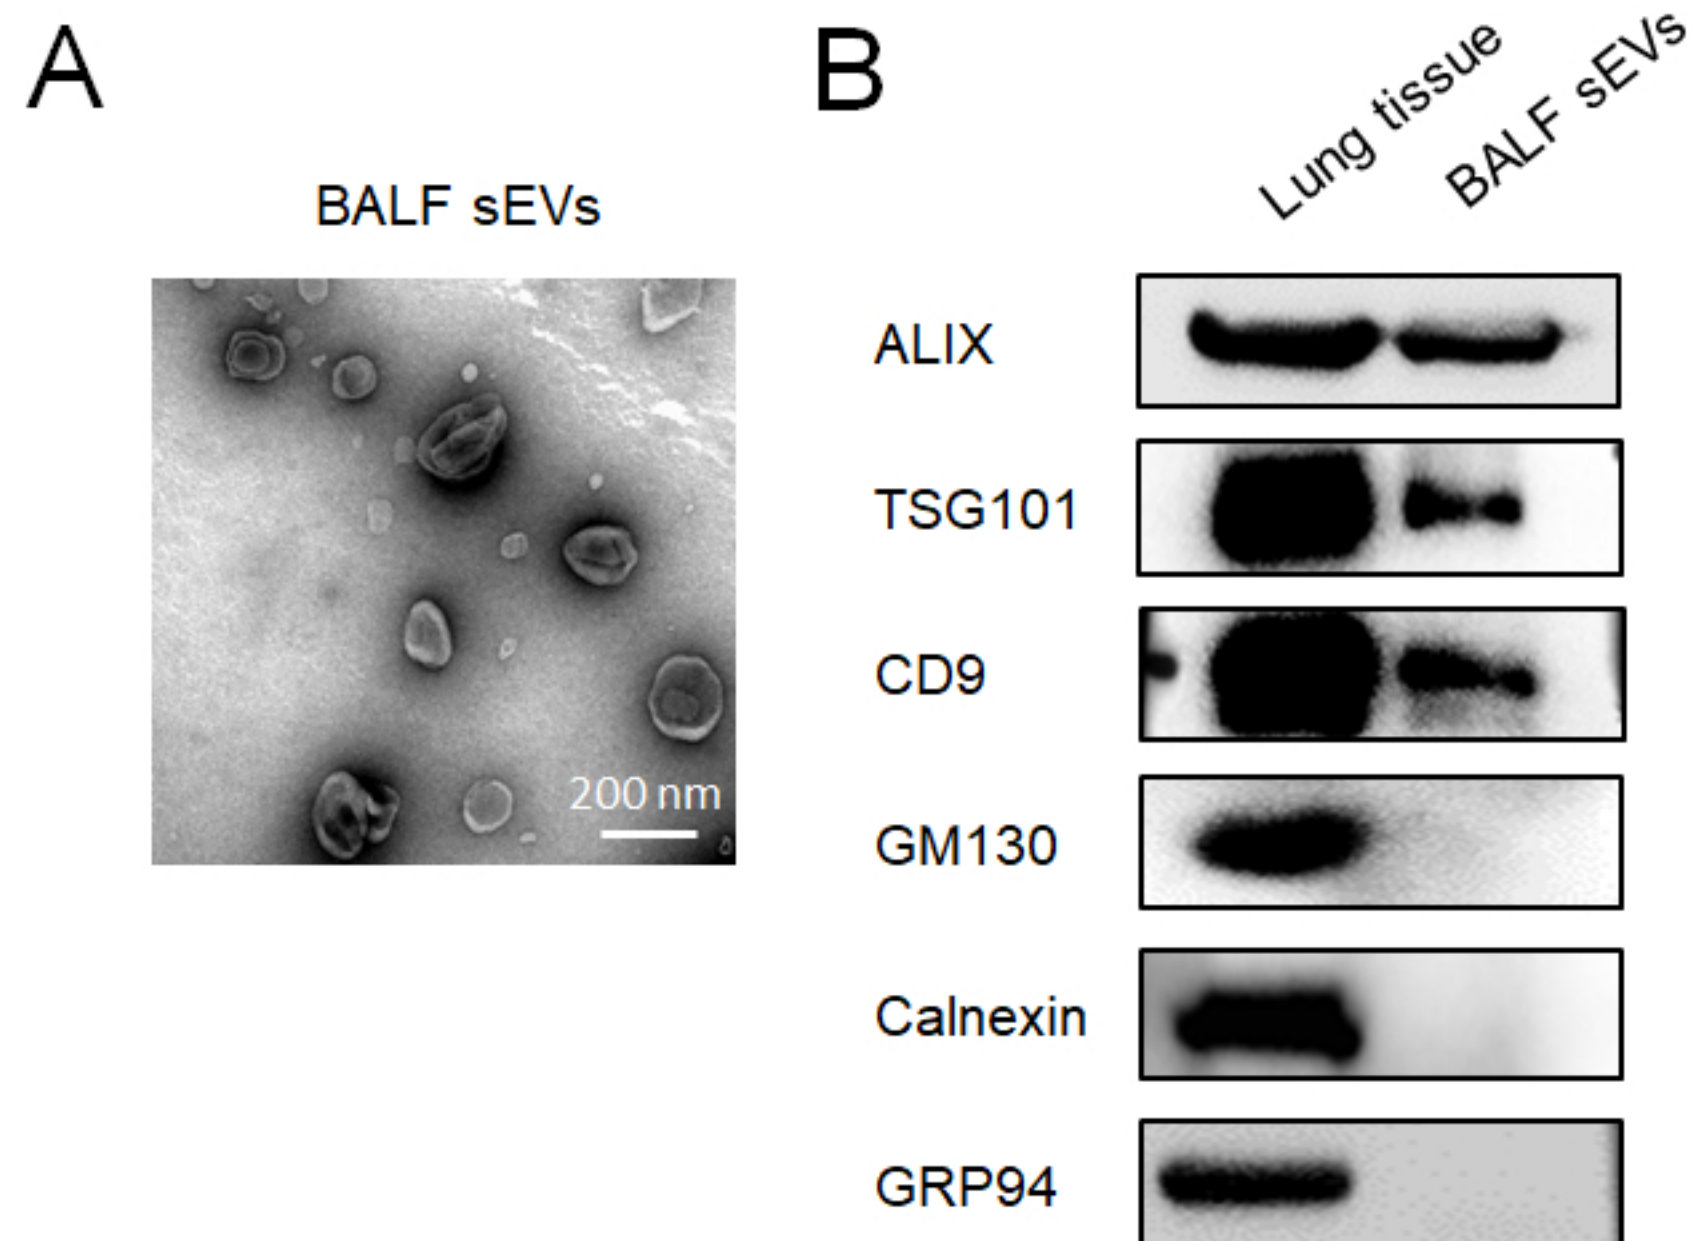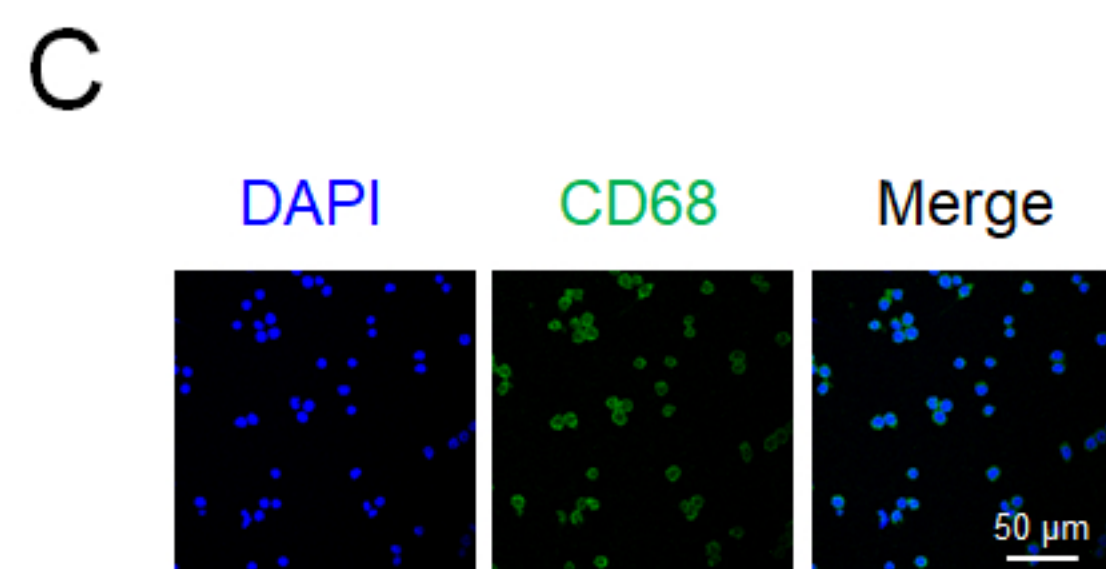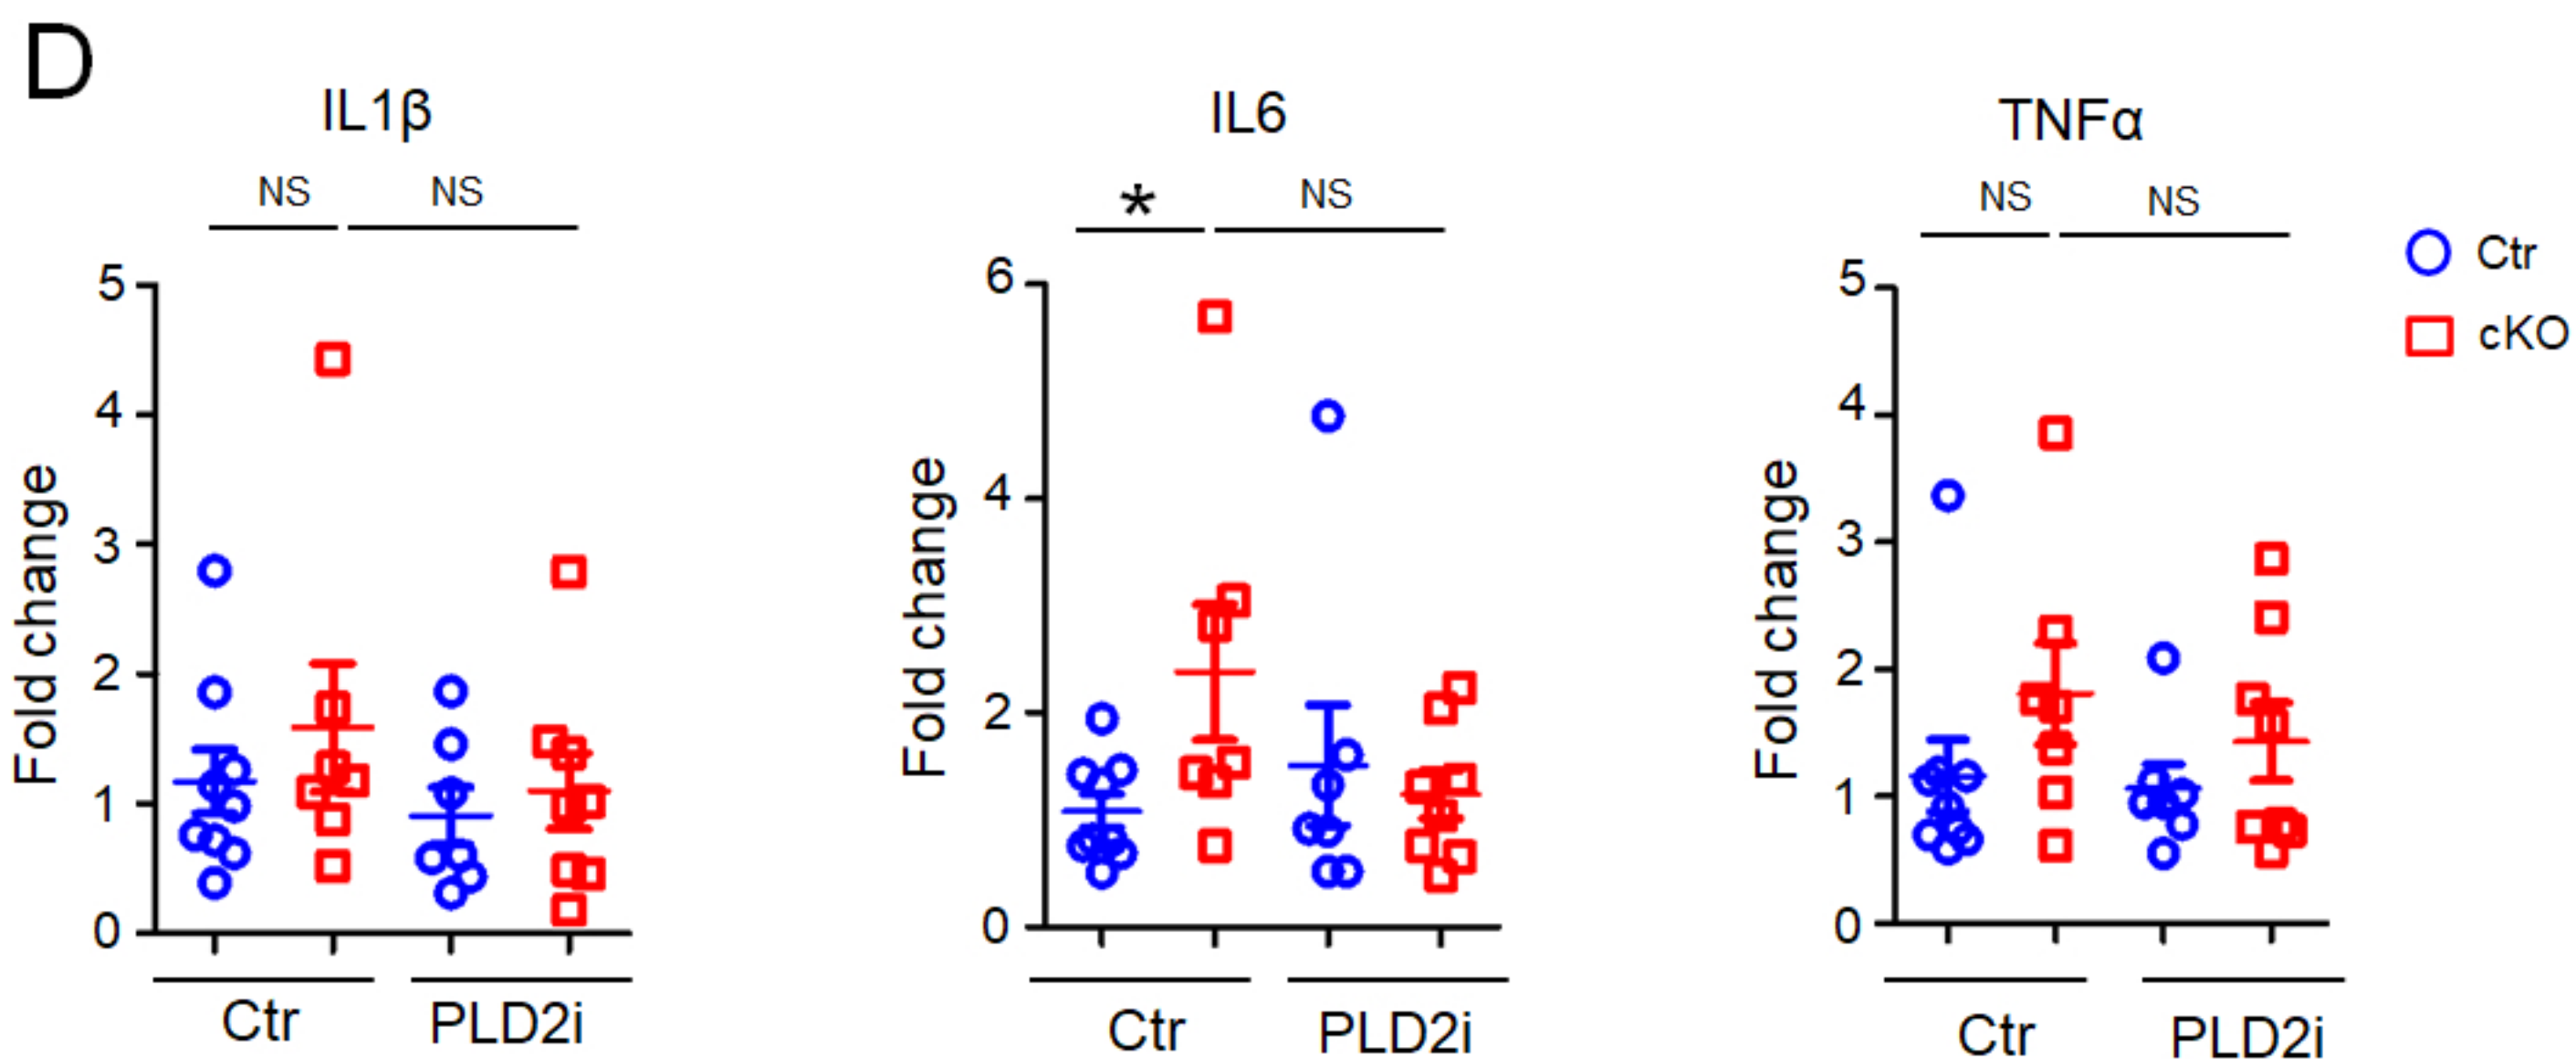

Supplement: JEV2-10-e12078-s001.pdf [file JEV2-10-e12078-s001.pdf]
